# Supplementary material for: Polyradical character assessment using multireference calculations and comparison with density-functional derived fractional occupation number weighted density analysis
Source: Royal Society of Chemistry journal article supplement (doi:10.1039/d3cp03734g), 2023-01-01
Supplement: d3cp03734g1.pdf [file d3cp03734g1.pdf]

## Supplementary Material

### **Polyradical Character Assessment using Multireference Calculations and Comparison with Density-Functional Derived Fractional Occupation Number Weighted Density Analysis**

Reed Nieman,<sup>1,a</sup> Jhonatas R. Carvalho,<sup>1,a</sup> Bhumika Jayee,<sup>1,a,b</sup> Andreas Hansen,<sup>2</sup> Adelia J. A. Aquino,<sup>3</sup> Miklos Kertesz,<sup>4</sup> Hans Lischka<sup>1\*</sup>

<sup>1</sup>Department of Chemistry and Biochemistry, Texas Tech University, Lubbock, TX 79409-1061, USA

<sup>2</sup> Mulliken Center for Theoretical Chemistry, Universität Bonn, D- 53115 (Germany)

<sup>3</sup>Department of Mechanical Engineering, Texas Tech University, Lubbock, TX 79409-1061, USA

<sup>4</sup>Chemistry Department and Institute of Soft Matter, Georgetown University, Washington, District of Columbia 20057-1227, USA

<sup>a</sup> These authors contributed equally to this publication.

<sup>b</sup> Current address: Department of Chemistry and Chemical Biology, Northeastern University, Boston MA, 02115, USA

\* email: Hans.Lischka@ttu.edu

## Table of Contents:

|            |                                                                                                       |             |
|------------|-------------------------------------------------------------------------------------------------------|-------------|
| Table S1   | Comparison with/without D3                                                                            | Pg. S3      |
| Table S2   | FT-UDFT $N_{\text{FOD}}$ and $f_i$ values for <b>1-4</b> for various density functionals              | Pg. S3      |
| Table S3   | FT-RDFT $N_{\text{FOD}}$ and $f_i$ values for <b>1-4</b> for various density functionals              | Pg. S4      |
| Figure S1  | NO occupation vs. $f_i$ values for <b>1-4</b>                                                         | Pg. S5      |
| Figure S2  | Unpaired density and FOD plots for <b>1, 2, and 4</b>                                                 | Pg. S6      |
| Table S4   | FT-UDFT $N_{\text{FOD}}$ and $f_i$ values for <b>5-14</b> for various density functionals             | Pg. S7      |
| Table S5   | FT-RDFT $N_{\text{FOD}}$ and $f_i$ values for <b>5-14</b> for various density functionals             | Pg. S8      |
| Figure S3  | NO occupation vs. $f_i$ values for <b>10-14</b>                                                       | Pg. S9      |
| Figure S4  | Unpaired density and FOD plots for <b>5-9</b>                                                         | Pg. S10     |
| Figure S5  | Unpaired density and FOD plots for <b>10, 11, 13, and 14</b>                                          | Pg. S11     |
| Table S6   | FT-UDFT $N_{\text{FOD}}$ and $f_i$ values for <b>15-19</b> for various density functionals            | Pg. S12     |
| Table S7   | FT-RDFT $N_{\text{FOD}}$ and $f_i$ values for <b>15, 16, and 18</b> for various density functionals   | Pg. S13     |
| Figure S6  | Unpaired density and FOD plots for <b>15, 17, and 18</b>                                              | Pg. S14     |
| Table S8   | FT-RDFT $N_{\text{FOD}}$ and $f_i$ values for <b>25-29</b> for various density functionals            | Pg. S15     |
| Table S9   | FT-UDFT $N_{\text{FOD}}$ and $f_i$ values for <b>20-29</b> for various density functionals            | Pg. S16     |
| Figure S7  | Unpaired density and FOD plots for <b>20-27</b>                                                       | Pg. S17     |
| Figure S8  | $N_{\text{U}}$ vs. $N_{\text{FOD}}$ (M05-2X) with FT-UDFT approach                                    | Pg. S18     |
| Figure S9  | $N_{\text{U}}$ vs. $N_{\text{FOD}}$ (TPSS) with FT-RDFT approach                                      | Pg. S19     |
| Figure S10 | $N_{\text{U}}$ vs. $N_{\text{FOD}}$ (B3LYP) with FT-UDFT and FT-RDFT approaches                       | Pg. S20     |
| Figure S11 | $N_{\text{U}}$ vs. $n_{\text{LUNO}}$ for various density functionals                                  | Pg. S21     |
| Figure S12 | Comparison of $\Delta E_{\text{S-T}}$ calculated with MR-AQCC/MR-CISD and various density functionals | Pg. S22     |
|            | Optimized Cartesian Coordinates                                                                       | Pg. S23-S49 |

Table S1: RMSD values for the difference in Cartesian geometries and a comparison of  $N_{\text{FOD}}$  and  $N_{\text{U}}$  values for structures optimized without and with D3 contribution, respectively.

| Str       | RMSD (Å) | $N_{\text{FOD}}$ ( $e$ ) |                      |           | $N_{\text{U}}$ ( $e$ ) |
|-----------|----------|--------------------------|----------------------|-----------|------------------------|
|           |          | no D3 vs.                | geom.: no D3/with D3 |           | Geom.: no D3/with D3   |
|           | with D3  | TPSS                     | B3LYP                | M05-2X    | MR-AQCC                |
| <b>3</b>  | 0.008    | 2.00/2.13                | 2.65/2.75            | 4.14/4.23 | 1.97/2.30              |
| <b>12</b> | 0.006    | 1.72/1.72                | 2.36/2.35            | 3.59/3.58 | 2.14/2.29              |
| <b>15</b> | 0.001    | 1.48/1.48                | 2.30/2.30            | 3.94/3.94 | 1.64/1.64              |
| <b>28</b> | 0.000    | 0.81/0.81                | 1.26/1.26            | 2.04/2.04 | 0.99/0.99              |

Table S2: HOMO-LUMO  $f_i$  and  $N_{\text{FOD}}$  values (M05-2X/def2-TZVP, TPSS/def2-TZVP, and B3LYP /def2-TZVP method with FT-UDFT approaches) for n-acenes (**1-4**) at TPSS optimized geometry. FT-DFT calculations performed with literature-recommended temperature (M05-2X: 16200 K, TPSS: 5000 K, B3LYP: 9000 K) and improved present temperature (M05-2X: 12200 K, TPSS: 6200 K, B3LYP: 8200 K, values italics). All values are given in units of  $e$ .

| Str      | FT-UDFT/M05-2X/FOD |             |                  |             | FT-UDFT/TPSS/FOD |             |                  |      | FT-UDFT/B3LYP/FOD |             |                  |             |
|----------|--------------------|-------------|------------------|-------------|------------------|-------------|------------------|------|-------------------|-------------|------------------|-------------|
|          | $f_i$ Values       |             | $N_{\text{FOD}}$ |             | $f_i$ Values     |             | $N_{\text{FOD}}$ |      | $f_i$ Values      |             | $N_{\text{FOD}}$ |             |
| <b>1</b> | -                  | -           | -                | -           | -                | -           | -                | -    | -                 | -           | -                | -           |
| <b>2</b> | 1.32               | <i>1.51</i> | 2.96             | <i>1.55</i> | -                | -           | -                | -    | 1.41              | <i>1.45</i> | 1.78             | <i>1.53</i> |
|          | 0.65               | <i>0.50</i> |                  |             | -                | -           |                  |      | 0.62              | <i>0.57</i> |                  |             |
| <b>3</b> | 1.18               | <i>1.32</i> | 4.14             | 2.36        | 1.24             | <i>1.20</i> | 2.00             | 2.42 | 1.23              | <i>1.26</i> | 2.65             | 2.33        |
|          | 0.80               | <i>0.70</i> |                  |             | 0.80             | <i>0.85</i> |                  |      | 0.81              | <i>0.78</i> |                  |             |
| <b>4</b> | 1.02               | <i>1.13</i> | 5.49             | 3.34        | 1.07             | <i>1.07</i> | 2.82             | 3.31 | 1.04              | <i>1.05</i> | 3.68             | 3.34        |
|          | 0.97               | <i>0.90</i> |                  |             | 0.98             | <i>0.99</i> |                  |      | 1.02              | <i>1.01</i> |                  |             |

Table S3: HOMO-LUMO  $f_i$  and  $N_{\text{FOD}}$  values (TPSS/def2-TZVP and B3LYP/def2-TZVP methods with FT-RDFT approach) for the  $n$ -acenes (**1-4**). FT-DFT calculations performed with literature-recommended temperature (TPSS: 5000 K, B3LYP: 9000 K) and improved present temperature (TPSS: 6200 K, B3LYP: 8200 K, values italics). All values are given in units of  $e$ .

| Str      | FT-RDFT/TPSS/FOD |      |                  |      | FT-RDFT/B3LYP/FOD |      |                  |      |             |
|----------|------------------|------|------------------|------|-------------------|------|------------------|------|-------------|
|          | $f_i$ Values     |      | $N_{\text{FOD}}$ |      | $f_i$ Values      |      | $N_{\text{FOD}}$ |      |             |
| <b>1</b> | H                | 1.76 | <i>1.67</i>      | 0.52 | <i>0.80</i>       | 1.66 | <i>1.71</i>      | 0.95 | <i>0.76</i> |
|          | L                | 0.25 | <i>0.34</i>      |      |                   | 0.35 | <i>0.30</i>      |      |             |
| <b>2</b> | H                | 1.47 | <i>1.40</i>      | 1.25 | <i>1.60</i>       | 1.41 | <i>1.45</i>      | 1.78 | <i>1.53</i> |
|          | L                | 0.56 | <i>0.64</i>      |      |                   | 0.62 | <i>0.57</i>      |      |             |
| <b>3</b> | H                | 1.24 | <i>1.20</i>      | 2.00 | <i>2.42</i>       | 1.23 | <i>1.26</i>      | 2.65 | <i>2.33</i> |
|          | L                | 0.80 | <i>0.85</i>      |      |                   | 0.81 | <i>0.78</i>      |      |             |
| <b>4</b> | H                | 1.07 | <i>1.07</i>      | 2.82 | <i>3.31</i>       | 1.03 | <i>1.04</i>      | 3.68 | <i>3.34</i> |
|          | L                | 0.98 | <i>0.99</i>      |      |                   | 1.02 | <i>1.01</i>      |      |             |

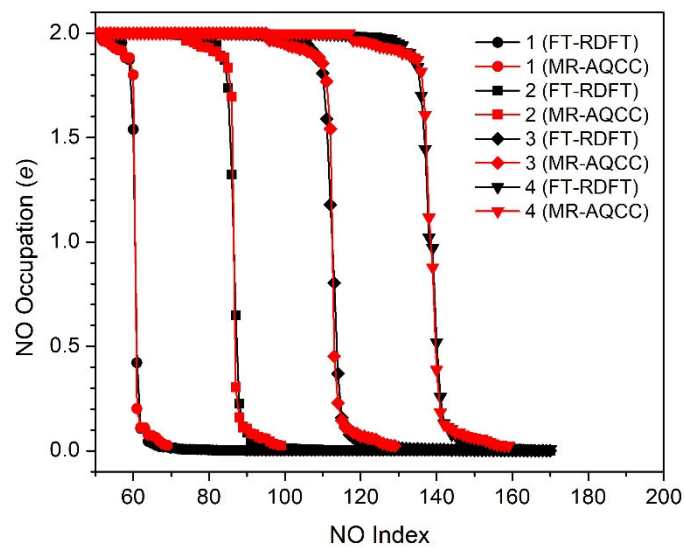

Figure S1: Comparison between FT-RDFT/M05-2X  $f_i$  occupation and MR-AQCC NO occupation for the  $n$ -acenes (1-4). FT-RDFT calculations performed at the literature-recommended FT of 16200 K.

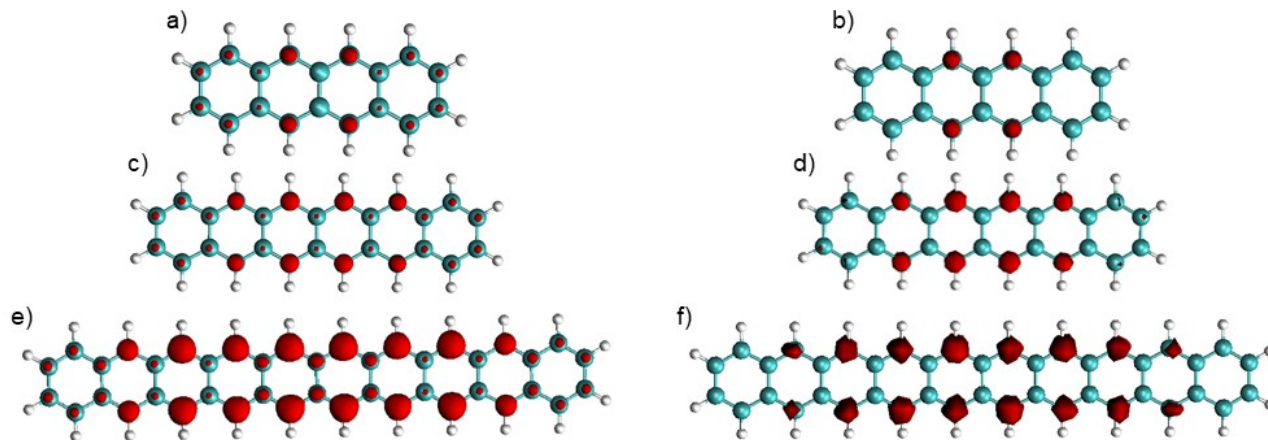

Figure S2: Total MR-AQCC unpaired density plots for a) **1**, c) **2**, and e) **4** and the corresponding FT-DFT FOD (TPSS density functional, literature-recommended temperature, 5000 K) for b) **1**, d) **2**, and f) **4**. The isovalue = 0.004  $e/\text{bohr}^3$

Table S4: HOMO-LUMO  $f_i$  and  $N_{\text{FOD}}$  values (M05-2X/def2-TZVP, TPSS/def2-TZVP, and B3LYP/def2-TZVP method with FT-UDFT approaches) for trans-diindenoacenes (**5-9**) and cis-diindenoacenes (**10-14**) at TPSS optimized geometry. FT-UDFT calculations performed with literature-recommended temperatures (M05-2X: 16200 K, TPSS: 5000 K, B3LYP: 9000 K) and improved present temperatures (M05-2X: 12200 K, TPSS: 6200 K, B3LYP: 8200 K, values in italics). All values are given in units of  $e$ .

| Str       |   | FT-UDFT/M05-2X/FOD |             |                  |             | FT-UDFT/TPSS/FOD |             |                  |             | FT-UDFT/B3LYP/FOD |             |                  |  |
|-----------|---|--------------------|-------------|------------------|-------------|------------------|-------------|------------------|-------------|-------------------|-------------|------------------|--|
|           |   | $f_i$ Values       |             | $N_{\text{FOD}}$ |             | $f_i$ Values     |             | $N_{\text{FOD}}$ |             | $f_i$ Values      |             | $N_{\text{FOD}}$ |  |
| <b>5</b>  | H | -                  | -           | -                | -           | -                | -           | -                | -           | -                 | -           | -                |  |
|           | L | -                  | -           | -                | -           | -                | -           | -                | -           | -                 | -           | -                |  |
| <b>6</b>  | H | 1.44               | <i>1.58</i> | 2.80             | <i>1.51</i> | -                | -           | 1.53             | <i>1.56</i> | 1.70              | <i>1.46</i> |                  |  |
|           | L | 0.73               | <i>0.56</i> | -                | -           | -                | -           | 0.65             | <i>0.59</i> | -                 | -           |                  |  |
| <b>7</b>  | H | 1.33               | <i>1.45</i> | 3.36             | <i>1.91</i> | -                | -           | 1.41             | <i>1.43</i> | 2.08              | <i>1.81</i> |                  |  |
|           | L | 0.78               | <i>0.66</i> | -                | -           | -                | -           | 0.72             | <i>0.67</i> | -                 | -           |                  |  |
| <b>8</b>  | H | 1.24               | <i>1.33</i> | 3.93             | <i>2.32</i> | 1.35             | <i>1.31</i> | 1.72             | <i>2.16</i> | 1.30              | <i>1.32</i> |                  |  |
|           | L | 0.82               | <i>0.73</i> | 0.65             | <i>0.73</i> | 0.77             | <i>0.73</i> | 0.77             | <i>0.73</i> | 2.49              | <i>2.19</i> |                  |  |
| <b>9</b>  | H | 1.18               | <i>1.25</i> | 4.50             | <i>2.71</i> | 1.27             | <i>1.24</i> | 2.04             | <i>2.54</i> | 1.39              | <i>1.43</i> |                  |  |
|           | L | 0.84               | <i>0.77</i> | 0.68             | <i>0.75</i> | 0.65             | <i>0.59</i> | 0.65             | <i>0.59</i> | 2.52              | <i>2.14</i> |                  |  |
| <b>10</b> | H | 1.65               | <i>1.47</i> | 1.87             | <i>1.66</i> | 1.44             | <i>1.41</i> | 1.39             | <i>1.65</i> | 1.41              | <i>1.43</i> |                  |  |
|           | L | 0.46               | <i>0.71</i> | 0.68             | <i>0.78</i> | 0.80             | <i>0.75</i> | 0.80             | <i>0.75</i> | 1.83              | <i>1.65</i> |                  |  |
| <b>11</b> | H | 1.63               | <i>1.38</i> | 2.17             | <i>1.94</i> | 1.38             | <i>1.35</i> | 1.51             | <i>1.82</i> | 1.46              | <i>1.50</i> |                  |  |
|           | L | 0.45               | <i>0.77</i> | 0.71             | <i>0.80</i> | 0.67             | <i>0.62</i> | 0.67             | <i>0.62</i> | 1.76              | <i>1.52</i> |                  |  |
| <b>12</b> | H | 1.22               | <i>1.28</i> | 3.59             | <i>2.25</i> | 1.30             | <i>1.27</i> | 1.72             | <i>2.08</i> | 1.35              | <i>1.36</i> |                  |  |
|           | L | 0.89               | <i>0.82</i> | 0.76             | <i>0.82</i> | 0.77             | <i>0.74</i> | 0.77             | <i>0.74</i> | 2.16              | <i>1.92</i> |                  |  |
| <b>13</b> | H | 1.15               | <i>1.20</i> | 4.11             | <i>2.58</i> | 1.21             | <i>1.19</i> | 1.98             | <i>2.39</i> | 1.51              | <i>1.54</i> |                  |  |
|           | L | 0.90               | <i>0.85</i> | 0.78             | <i>0.84</i> | 0.54             | <i>0.49</i> | 0.54             | <i>0.49</i> | 1.97              | <i>1.66</i> |                  |  |
| <b>14</b> | H | 1.10               | <i>1.14</i> | 4.65             | <i>2.93</i> | 1.14             | <i>1.13</i> | 2.28             | <i>2.74</i> | 1.47              | <i>1.50</i> |                  |  |
|           | L | 0.91               | <i>0.87</i> | 0.81             | <i>0.85</i> | 0.54             | <i>0.49</i> | 0.54             | <i>0.49</i> | 2.26              | <i>1.92</i> |                  |  |

Table S5: HOMO-LUMO  $f_i$  and  $N_{\text{FOD}}$  values (TPSS/def2-TZVP and B3LYP/def2-TZVP methods with FT-RDFT approach) for trans-diindenoacenes (**5-9**) and cis-diindenoacenes (**10-14**) at TPSS optimized geometry. FT-RDFT calculations performed with literature-recommended temperature (TPSS: 5000 K, B3LYP: 9000 K) and improved present temperature (TPSS: 6200 K, B3LYP: 8200 K, values italics). All values are given in units of  $e$ .

| Str       |   | FT-RDFT/TPSS/FOD |                  | FT-RDFT/B3LYP/FOD |             |                  |             |
|-----------|---|------------------|------------------|-------------------|-------------|------------------|-------------|
|           |   | $f_i$ Values     | $N_{\text{FOD}}$ | $f_i$ Values      |             | $N_{\text{FOD}}$ |             |
| <b>5</b>  | H | 1.77 <i>1.70</i> | 0.78 <i>1.12</i> | 1.69              | <i>1.73</i> | 1.30             | <i>1.08</i> |
|           | L | 0.37 <i>0.50</i> |                  | 0.52              | <i>0.46</i> |                  |             |
| <b>6</b>  | H | 1.60 <i>1.54</i> | 1.10 <i>1.47</i> | 1.53              | <i>1.56</i> | 1.70             | <i>1.46</i> |
|           | L | 0.50 <i>0.62</i> |                  | 0.65              | <i>0.59</i> |                  |             |
| <b>7</b>  | H | 1.47 <i>1.42</i> | 1.39 <i>1.80</i> | 1.41              | <i>1.43</i> | 2.08             | <i>1.81</i> |
|           | L | 0.59 <i>0.68</i> |                  | 0.72              | <i>0.67</i> |                  |             |
| <b>8</b>  | H | 1.36 <i>1.31</i> | 1.72 <i>2.18</i> | 1.30              | <i>1.32</i> | 2.49             | <i>2.19</i> |
|           | L | 0.65 <i>0.73</i> |                  | 0.77              | <i>0.73</i> |                  |             |
| <b>9</b>  | H | 1.27 <i>1.24</i> | 2.04 <i>2.54</i> | 1.23              | <i>1.25</i> | 2.89             | <i>2.56</i> |
|           | L | 0.68 <i>0.75</i> |                  | 0.79              | <i>0.76</i> |                  |             |
| <b>10</b> | H | 1.44 <i>1.41</i> | 1.39 <i>1.65</i> | 1.41              | <i>1.43</i> | 1.83             | <i>1.65</i> |
|           | L | 0.68 <i>0.78</i> |                  | 0.80              | <i>0.75</i> |                  |             |
| <b>11</b> | H | 1.38 <i>1.35</i> | 1.51 <i>1.82</i> | 1.35              | <i>1.36</i> | 2.05             | <i>1.84</i> |
|           | L | 0.71 <i>0.80</i> |                  | 0.83              | <i>0.79</i> |                  |             |
| <b>12</b> | H | 1.30 <i>1.27</i> | 1.72 <i>2.08</i> | 1.26              | <i>1.28</i> | 2.36             | <i>2.11</i> |
|           | L | 0.76 <i>0.82</i> |                  | 0.85              | <i>0.82</i> |                  |             |
| <b>13</b> | H | 1.21 <i>1.19</i> | 1.98 <i>2.39</i> | 1.19              | <i>1.20</i> | 2.70             | <i>2.42</i> |
|           | L | 0.79 <i>0.84</i> |                  | 0.87              | <i>0.85</i> |                  |             |
| <b>14</b> | H | 1.14 <i>1.13</i> | 2.28 <i>2.74</i> | 1.13              | <i>1.14</i> | 3.08             | <i>2.76</i> |
|           | L | 0.81 <i>0.85</i> |                  | 0.88              | <i>0.86</i> |                  |             |



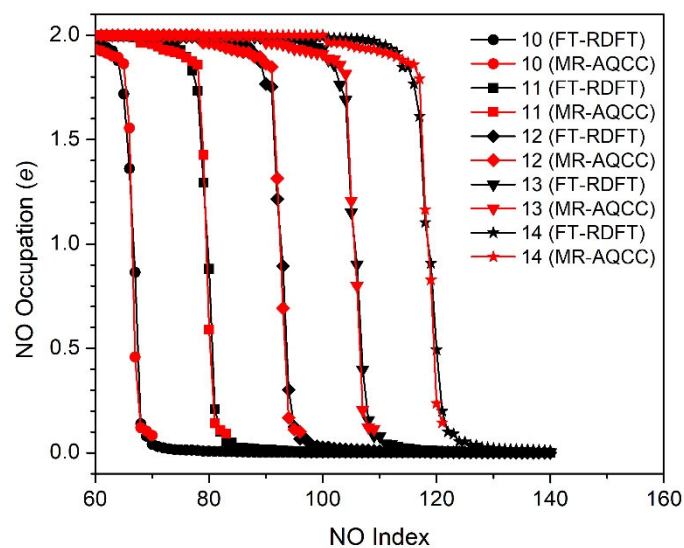

Figure S3: Comparison between FT-RDFT/M05-2X<sub>f<sub>i</sub></sub> occupation and MR-AQCC NO occupation for all cis-diindenoacenes (**10-14**). FT-RDFT calculations performed with the literature-recommended FT of 16200 K.

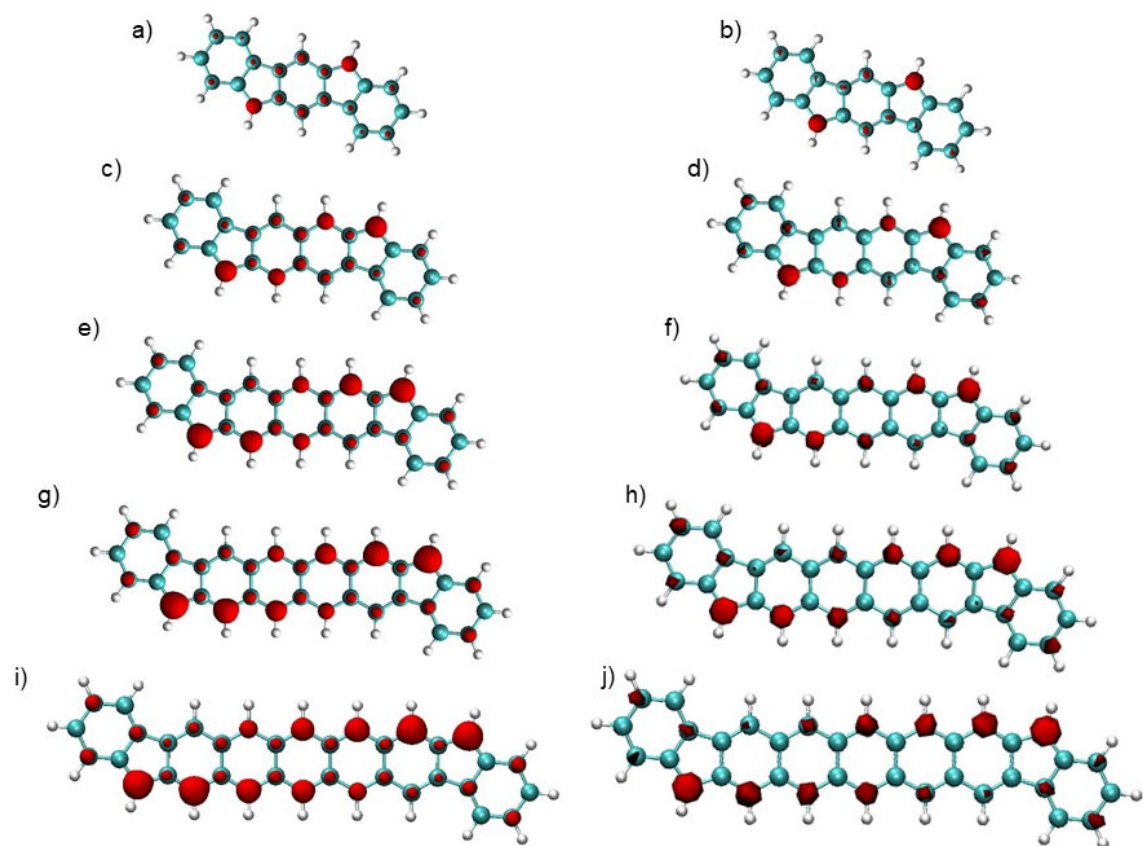

Figure S4: Total MR-AQCC unpaired density plots for a) **5**, c) **6**, e) **7**, g) **8**, and i) **9** and the corresponding FT-DFT FOD (TPSS density functional, literature-recommended temperature, 5000 K) for b) **5**, d) **6**, f) **7**, h) **8**, and j) **9**. The isovalue =  $0.004 e/\text{bohr}^3$

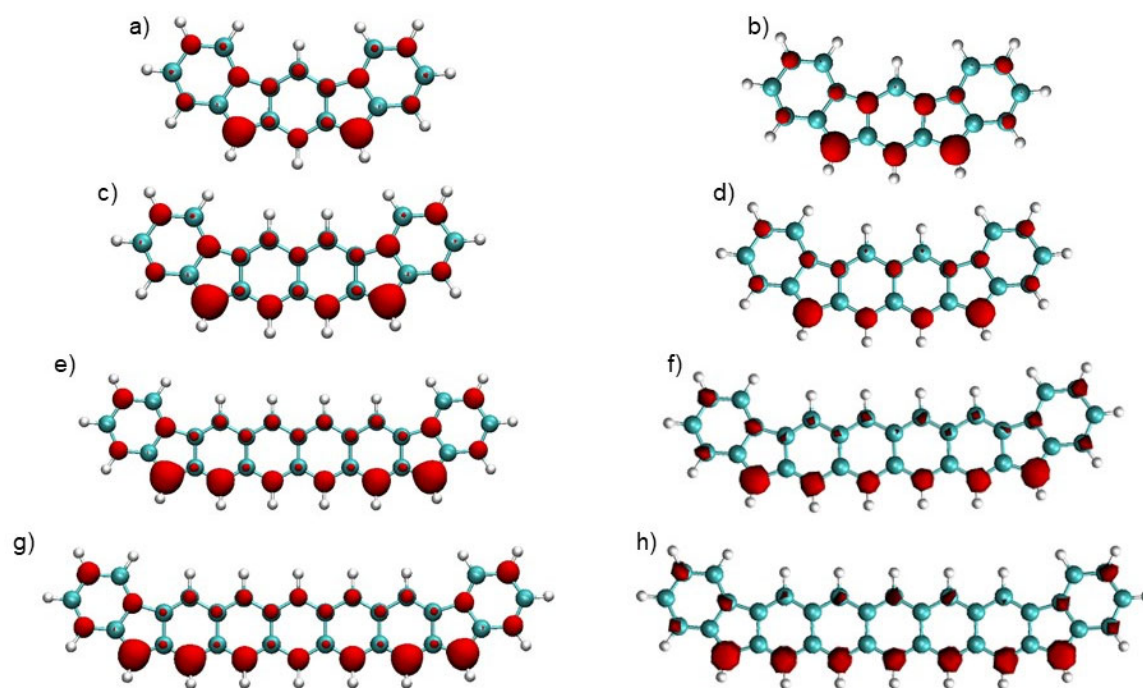

Figure S5: Total MR-AQCC unpaired density plots for a) **10**, c) **11**, e) **13**, and g) **14** and the corresponding FT-DFT FOD (TPSS density functional, literature-recommended temperature, 5000 K) for b) **10**, d) **11**, f) **13**, and h) **14**. The isovalue =  $0.004 e/\text{bohr}^3$

Table S6: HOMO-LUMO  $f_i$  and  $N_{\text{FOD}}$  values (M05-2X/def2-TZVP, TPSS/def2-TZVP, and B3LYP/def2-TZVP method with FT-UDFT approaches) for the zethrenes (**15-19**) at TPSS optimized geometry. FT-DFT calculations performed with the literature-recommended temperature (M05-2X: 16200 K, TPSS: 5000 K, B3LYP: 9000 K) and improved present temperature (M05-2X: 12200 K, TPSS: 6200 K, B3LYP: 8200 K, values italics). The  $N_{\text{U,red.}}$  and  $N_{\text{FOD,red.}}$  values are provided in parentheses for structures with triplet ground states (**17** and **19**). All values are given in units of  $e$ .

| Str       | FT-UDFT/M05-2X/FOD |      |                                               |        | FT-UDFT/TPSS/FOD |      |                                               |        | FT-UDFT/B3LYP/FOD |             |                                               |             |               |
|-----------|--------------------|------|-----------------------------------------------|--------|------------------|------|-----------------------------------------------|--------|-------------------|-------------|-----------------------------------------------|-------------|---------------|
|           | $f_i$ Values       |      | $N_{\text{FOD}}$<br>( $N_{\text{FOD,red.}}$ ) |        | $f_i$ Values     |      | $N_{\text{FOD}}$<br>( $N_{\text{FOD,red.}}$ ) |        | $f_i$ Values      |             | $N_{\text{FOD}}$<br>( $N_{\text{FOD,red.}}$ ) |             |               |
| <b>15</b> | H                  | 1.21 | <i>1.36</i>                                   | 3.94   | <i>2.12</i>      | -    | -                                             | -      | 1.31              | <i>1.35</i> | 2.30                                          | <i>1.97</i> |               |
|           | L                  | 0.67 | <i>0.56</i>                                   |        |                  | -    | -                                             |        | 0.63              | <i>0.60</i> |                                               |             |               |
| <b>16</b> | H                  | 1.19 | <i>1.34</i>                                   | 3.18   | <i>1.82</i>      | 1.35 | <i>1.29</i>                                   | 1.39   | <i>1.70</i>       | 1.38        | <i>1.43</i>                                   | 1.75        | <i>1.49</i>   |
|           | L                  | 0.72 | <i>0.62</i>                                   |        |                  | 0.64 | <i>0.71</i>                                   |        |                   | 0.60        | <i>0.56</i>                                   |             |               |
| <b>17</b> | H                  | 1.73 | <i>1.86</i>                                   |        |                  | 1.89 | <i>1.91</i>                                   |        |                   | 1.81        | <i>1.84</i>                                   |             |               |
|           | S1                 | 0.99 | <i>1.01</i>                                   | 4.92   | <i>3.23</i>      | 1.01 | <i>1.00</i>                                   | 2.69   | <i>2.33</i>       | 1.02        | <i>1.02</i>                                   | 3.52        | <i>3.19</i>   |
|           | S2                 | 0.94 | <i>0.96</i>                                   | (2.92) | <i>(1.23)</i>    | 0.98 | <i>0.99</i>                                   | (0.69) | <i>(0.33)</i>     | 0.97        | <i>0.97</i>                                   | (1.52)      | <i>(1.19)</i> |
|           | L                  | 0.26 | <i>0.14</i>                                   |        |                  | 0.12 | <i>0.10</i>                                   |        |                   | 0.20        | <i>0.17</i>                                   |             |               |
| <b>18</b> | H                  | -    | -                                             | -      | -                | -    | -                                             | -      | -                 | -           | -                                             | -           | -             |
|           | L                  | -    | -                                             |        |                  | -    | -                                             |        |                   | -           | -                                             |             |               |
| <b>19</b> | H                  | 1.79 | <i>1.89</i>                                   |        |                  | 1.93 | <i>1.88</i>                                   |        |                   | 1.87        | <i>1.89</i>                                   |             |               |
|           | S1                 | 0.97 | <i>0.99</i>                                   | 4.88   | <i>3.31</i>      | 1.00 | <i>1.00</i>                                   | 2.66   | <i>3.19</i>       | 1.00        | <i>1.00</i>                                   | 3.47        | <i>3.13</i>   |
|           | S2                 | 0.96 | <i>0.98</i>                                   | (2.88) | <i>(1.31)</i>    | 0.99 | <i>0.99</i>                                   | (0.66) | <i>(1.19)</i>     | 0.99        | <i>0.99</i>                                   | (1.47)      | <i>(1.13)</i> |
|           | L                  | 0.20 | <i>0.11</i>                                   |        |                  | 0.08 | <i>0.13</i>                                   |        |                   | 0.14        | <i>0.11</i>                                   |             |               |

Table S7: HOMO-LUMO  $f_i$  and  $N_{\text{FOD}}$  values (TPSS/def2-TZVP and B3LYP/def2-TZVP methods with FT-RDFT approach) for the zethrenes (**15**, **16**, **19**) at TPSS optimized geometry. FT-DFT calculations performed with literature-recommended temperature (TPSS: 5000 K, B3LYP: 9000 K) and improved present temperature (TPSS: 6200 K, B3LYP: 8200 K, values italics). All values are given in units of  $e$ .

| Str <sup>a</sup> |   | FT-RDFT/TPSS/FOD |             |                  |             | FT-RDFT/B3LYP/FOD |             |                  |             |
|------------------|---|------------------|-------------|------------------|-------------|-------------------|-------------|------------------|-------------|
|                  |   | $f_i$ Values     |             | $N_{\text{FOD}}$ |             | $f_i$ Values      |             | $N_{\text{FOD}}$ |             |
| <b>15</b>        | H | 1.40             | <i>1.33</i> | 1.48             | <i>1.95</i> | 1.31              | <i>1.35</i> | 2.30             | <i>1.97</i> |
|                  | L | 0.55             | <i>0.62</i> |                  |             | 0.63              | <i>0.60</i> |                  |             |
| <b>16</b>        | H | 1.35             | <i>1.29</i> | 1.39             | <i>1.70</i> | 1.28              | <i>1.31</i> | 1.96             | <i>1.72</i> |
|                  | L | 0.64             | <i>0.71</i> |                  |             | 0.70              | <i>0.67</i> |                  |             |
| <b>18</b>        | H | 1.84             | <i>1.76</i> | 0.55             | <i>0.97</i> | 1.75              | <i>1.79</i> | 1.23             | <i>0.95</i> |
|                  | L | 0.14             | <i>0.22</i> |                  |             | 0.23              | <i>0.19</i> |                  |             |

<sup>a</sup>Structures **17** and **19** have triplet ground states so the  $f_i$  and  $N_{\text{FOD}}$  values were not computed with FT-RDFT.

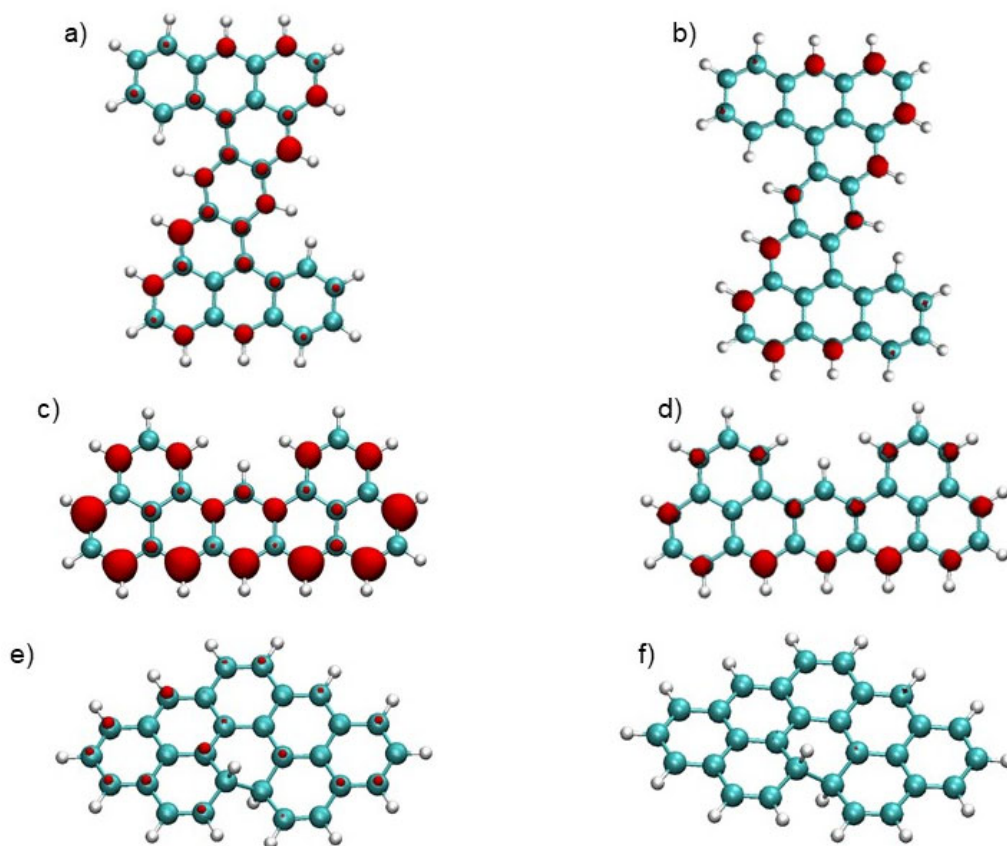

Figure S6: Total MR-AQCC unpaired density plots for a) **15**, c) **17**, and e) **18** and the corresponding FT-DFT FOD (TPSS density functional, literature-recommended temperature, 5000 K) for b) **15**, d) **17**, and f) **18**. The isovalue =  $0.004 e/\text{bohr}^3$

Table S8: HOMO-LUMO  $f_i$  and  $N_{\text{FOD}}$  values (TPSS/def2-TZVP and B3LYP/def2-TZVP methods with FT-RDFT approach) for **25-29** at TPSS optimized geometry. FT-DFT calculations performed with literature-recommended temperature (TPSS: 5000 K, B3LYP: 9000 K) and improved present temperature (TPSS: 6200 K, B3LYP: 8200 K, values italics). All values are given in units of  $e$ .

| Str <sup>a</sup> |   | FT-RDFT/TPSS/FOD |             |                  |             | FT-RDFT/B3LYP/FOD |             |                  |             |
|------------------|---|------------------|-------------|------------------|-------------|-------------------|-------------|------------------|-------------|
|                  |   | $f_i$ Values     |             | $N_{\text{FOD}}$ |             | $f_i$ Values      |             | $N_{\text{FOD}}$ |             |
| <b>25</b>        | H | 1.95             | <i>1.90</i> | 0.22             | <i>0.43</i> | 1.88              | <i>1.90</i> | 0.60             | <i>0.44</i> |
|                  | L | 0.10             | <i>0.18</i> |                  |             | 0.21              | <i>0.16</i> |                  |             |
| <b>26</b>        | H | 1.90             | <i>1.84</i> | 0.46             | <i>0.84</i> | 1.82              | <i>1.86</i> | 1.10             | <i>0.84</i> |
|                  | L | 0.18             | <i>0.28</i> |                  |             | 0.30              | <i>0.25</i> |                  |             |
| <b>27</b>        | H | 1.65             | <i>1.56</i> | 0.72             | <i>0.97</i> | 1.54              | <i>1.58</i> | 1.10             | <i>0.94</i> |
|                  | L | 0.35             | <i>0.45</i> |                  |             | 0.47              | <i>0.42</i> |                  |             |
| <b>28</b>        | H | 1.65             | <i>1.56</i> | 0.81             | <i>1.11</i> | 1.54              | <i>1.59</i> | 1.26             | <i>1.07</i> |
|                  | L | 0.36             | <i>0.46</i> |                  |             | 0.48              | <i>0.43</i> |                  |             |
| <b>29</b>        | H | 1.43             | <i>1.38</i> | 1.23             | <i>1.46</i> | 1.39              | <i>1.42</i> | 1.56             | <i>1.41</i> |
|                  | L | 0.57             | <i>0.62</i> |                  |             | 0.62              | <i>0.59</i> |                  |             |

<sup>a</sup>Structures **20-24** have doublet or triplet ground states so the  $f_i$  and  $N_{\text{FOD}}$  values were not computed with FT-RDFT.

Table S9: HOMO-LUMO  $f_i$  and  $N_{\text{FOD}}$  values (M05-2X/def2-TZVP, TPSS/def2-TZVP, and B3LYP/def2-TZVP method with FT-UDFT approaches) for **20-29** at TPSS optimized geometry. FT-DFT calculations performed with literature-recommended temperature (M05-2X: 16200 K, TPSS: 5000 K, B3LYP: 9000 K) and improved present temperature (M05-2X: 12200 K, TPSS: 6200 K, B3LYP: 8200 K, values italics). The  $N_{\text{U,red.}}$  and  $N_{\text{FOD,red.}}$  values are provided in parentheses for structures with doublet or triplet ground states (**20-24**). All values are given in units of  $e$ .

| Str       | FT-UDFT/M05-2X/FOD |      |                                               |        | FT-UDFT/TPSS/FOD |      |                                               |        | FT-UDFT/B3LYP/FOD |      |                                               |        |                 |
|-----------|--------------------|------|-----------------------------------------------|--------|------------------|------|-----------------------------------------------|--------|-------------------|------|-----------------------------------------------|--------|-----------------|
|           | $f_i$ Values       |      | $N_{\text{FOD}}$<br>( $N_{\text{FOD,red.}}$ ) |        | $f_i$ Values     |      | $N_{\text{FOD}}$<br>( $N_{\text{FOD,red.}}$ ) |        | $f_i$ Values      |      | $N_{\text{FOD}}$<br>( $N_{\text{FOD,red.}}$ ) |        |                 |
| <b>20</b> | H                  | 1.89 | <i>1.95</i>                                   | 2.29   | <i>1.62</i>      | 1.98 | <i>1.96</i>                                   | 1.23   | <i>1.47</i>       | 1.95 | <i>1.96</i>                                   | 1.61   | <i>1.46</i>     |
|           | S1                 | 0.96 | <i>0.98</i>                                   | (1.29) | ( <i>0.62</i> )  | 1.00 | <i>1.00</i>                                   | (0.23) | ( <i>0.47</i> )   | 1.00 | <i>1.00</i>                                   | (0.61) | ( <i>0.46</i> ) |
|           | L                  | 0.11 | <i>0.06</i>                                   |        |                  | 0.02 | <i>0.05</i>                                   |        |                   | 0.06 | <i>0.04</i>                                   |        |                 |
| <b>21</b> | H                  | 1.85 | <i>1.93</i>                                   |        |                  | 1.96 | <i>1.93</i>                                   |        |                   | 1.91 | <i>1.93</i>                                   |        |                 |
|           | S1                 | 0.99 | <i>1.00</i>                                   | 4.21   | <i>2.96</i>      | 1.01 | <i>1.01</i>                                   | 2.43   | <i>2.85</i>       | 1.01 | <i>1.01</i>                                   | 3.08   | <i>2.82</i>     |
|           | S2                 | 0.99 | <i>1.00</i>                                   | (2.21) | ( <i>0.96</i> )  | 1.01 | <i>1.01</i>                                   | (0.43) | ( <i>0.85</i> )   | 1.01 | <i>1.01</i>                                   | (1.08) | ( <i>0.82</i> ) |
|           | L                  | 0.14 | <i>0.07</i>                                   |        |                  | 0.04 | <i>0.07</i>                                   |        |                   | 0.08 | <i>0.06</i>                                   |        |                 |
| <b>22</b> | H                  | 1.87 | <i>1.94</i>                                   | 3.56   | <i>2.12</i>      | 1.85 | <i>1.84</i>                                   | 2.11   | <i>2.53</i>       | 1.91 | <i>1.91</i>                                   | 2.31   | <i>2.28</i>     |
|           | S1                 | 1.21 | <i>1.12</i>                                   | (2.56) | ( <i>1.12</i> )  | 1.23 | <i>1.24</i>                                   | (1.11) | ( <i>1.53</i> )   | 1.15 | <i>1.18</i>                                   | (1.31) | ( <i>1.28</i> ) |
|           | L                  | 0.25 | <i>0.11</i>                                   |        |                  | 0.10 | <i>0.15</i>                                   |        |                   | 0.15 | <i>0.13</i>                                   |        |                 |
| <b>23</b> | H                  | 1.79 | <i>1.89</i>                                   | 3.50   | <i>2.17</i>      | 1.94 | <i>1.90</i>                                   | 1.64   | <i>2.02</i>       | 1.88 | <i>1.90</i>                                   | 2.29   | <i>2.01</i>     |
|           | S1                 | 0.95 | <i>0.96</i>                                   | (2.50) | ( <i>1.17</i> )  | 0.98 | <i>0.98</i>                                   | (0.64) | ( <i>1.02</i> )   | 0.98 | <i>0.98</i>                                   | (1.29) | ( <i>1.01</i> ) |
|           | L                  | 0.21 | <i>0.11</i>                                   |        |                  | 0.08 | <i>0.12</i>                                   |        |                   | 0.13 | <i>0.11</i>                                   |        |                 |
| <b>24</b> | H                  | 1.76 | <i>1.86</i>                                   | 2.36   | <i>1.61</i>      | 1.89 | <i>1.83</i>                                   | 1.35   | <i>1.62</i>       | 1.85 | <i>1.86</i>                                   | 1.66   | <i>1.56</i>     |
|           | S1                 | 1.11 | <i>1.09</i>                                   | (1.36) | ( <i>0.61</i> )  | 1.10 | <i>1.13</i>                                   | (0.35) | ( <i>0.62</i> )   | 1.10 | <i>1.11</i>                                   | (0.66) | ( <i>0.56</i> ) |
|           | L                  | 0.15 | <i>0.07</i>                                   |        |                  | 0.03 | <i>0.08</i>                                   |        |                   | 0.09 | <i>0.07</i>                                   |        |                 |
| <b>25</b> | H                  | -    | -                                             | -      | -                | -    | -                                             | -      | -                 | -    | -                                             | -      | -               |
|           | L                  | -    | -                                             | -      | -                | -    | -                                             | -      | -                 | -    | -                                             | -      | -               |
| <b>26</b> | H                  | -    | -                                             | -      | -                | -    | -                                             | -      | -                 | -    | -                                             | -      | -               |
|           | L                  | -    | -                                             | -      | -                | -    | -                                             | -      | -                 | -    | -                                             | -      | -               |
| <b>27</b> | H                  | 1.42 | <i>1.61</i>                                   | 1.78   | <i>0.94</i>      | -    | -                                             | -      | -                 | 1.54 | <i>1.58</i>                                   | 1.10   | <i>0.94</i>     |
|           | L                  | 0.53 | <i>0.38</i>                                   |        |                  | -    | -                                             |        |                   | 0.47 | <i>0.42</i>                                   |        |                 |
| <b>28</b> | H                  | 1.67 | <i>1.80</i>                                   | 1.45   | <i>0.66</i>      | -    | -                                             | -      | -                 | 1.54 | <i>1.59</i>                                   | 1.26   | <i>1.07</i>     |
|           | L                  | 0.30 | <i>0.19</i>                                   |        |                  | -    | -                                             |        |                   | 0.48 | <i>0.43</i>                                   |        |                 |
| <b>29</b> | H                  | -    | -                                             | -      | -                | -    | -                                             | -      | -                 | -    | -                                             | -      | -               |
|           | L                  | -    | -                                             | -      | -                | -    | -                                             | -      | -                 | -    | -                                             | -      | -               |



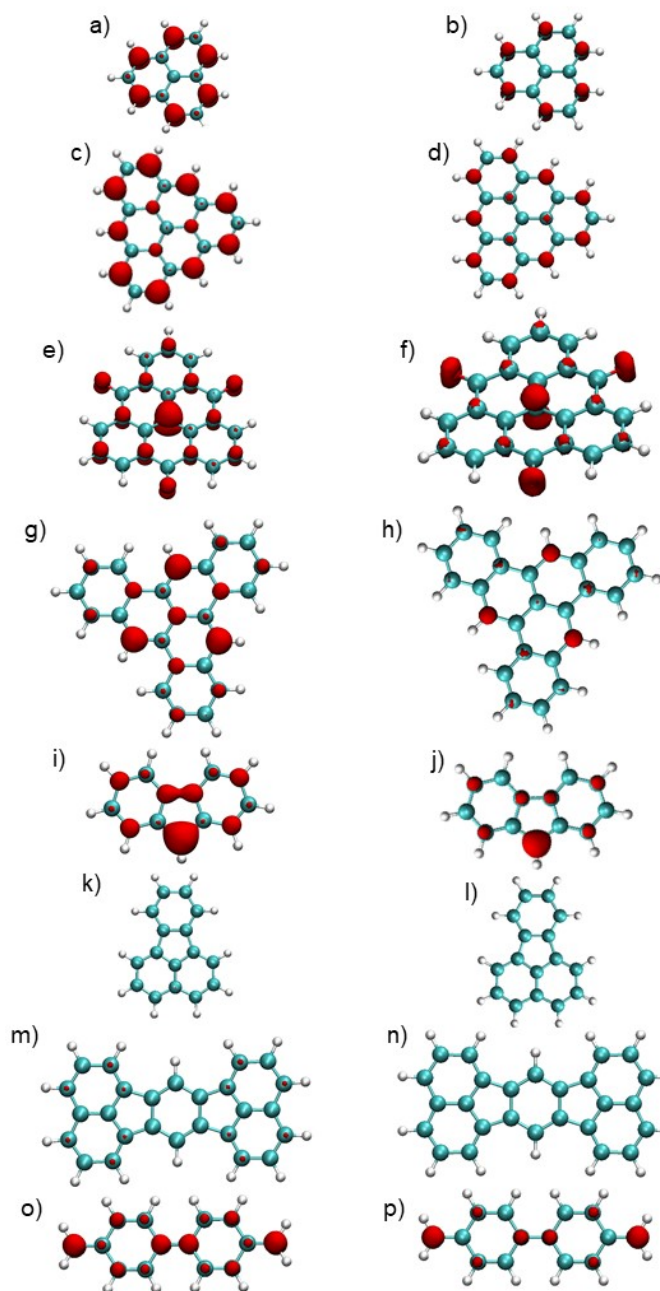

Figure S7: Total MR-AQCC unpaired density plots for a) **20**, c) **21**, e) **22**, g) **23**, i) **24**, k) **25**, m) **26**, and o) **27** and the corresponding FT-DFT FOD (TPSS density functional, literature-recommended temperature, 5000 K) for b) **20**, d) **21**, f) **22**, h) **23**, j) **24**, l) **25**, n) **26**, and p) **27**. The isovalue =  $0.004 e/\text{bohr}^3$

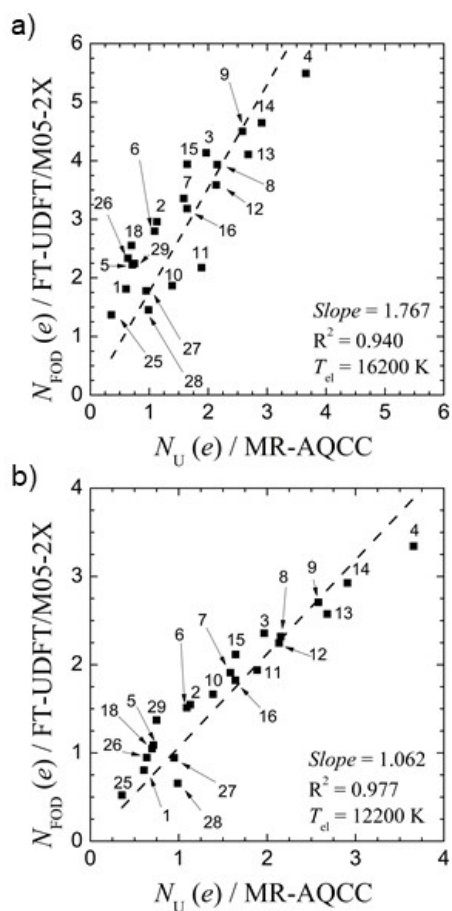

Figure S8: Comparison between MR-AQCC  $N_U$  values and FT-UDFT  $N_{FOD}$  numbers using the M05-2X density functional for structures with singlet ground electronic state (1-16, 18, 25-29) using a) the literature-recommended FT of 16200 K and b) the improved present FT of 12200 K. Included are the FT-RDFT structures for which there is no triplet instability: 1, 5, 18, 25, 26, 29.

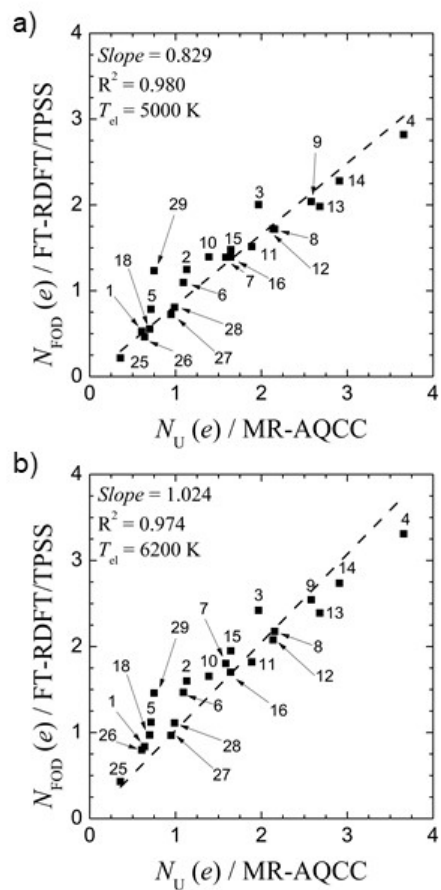

Figure S9: Comparison between MR-AQCC  $N_U$  values and FT-RDFT  $N_{\text{FOD}}$  numbers with the TPSS density functional for structures with singlet ground electronic state (**1-16, 18, 25-29**) using the a) literature-recommended FT of 5000 K and b) improved present FT of 6200 K.

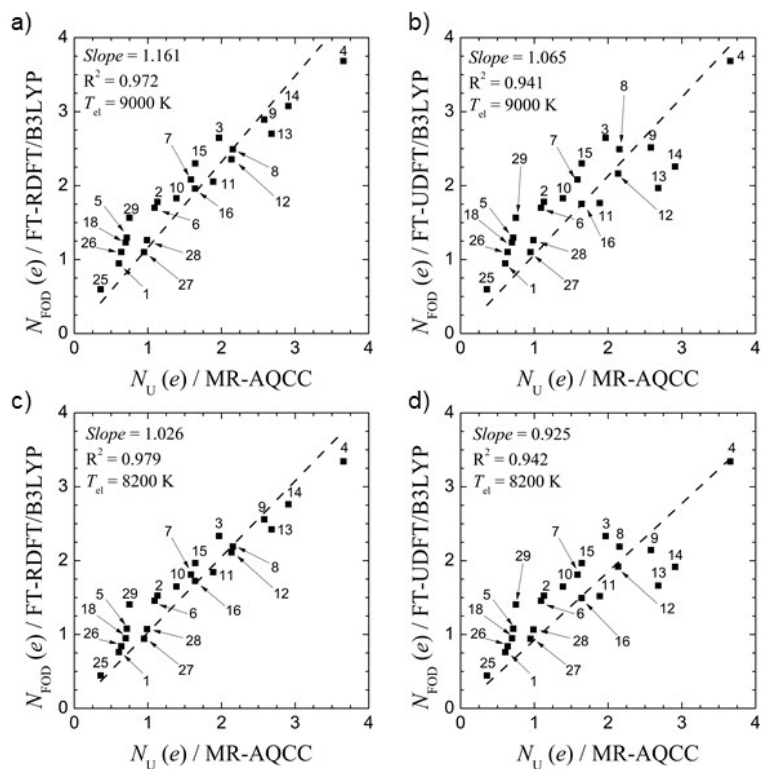

Figure S10: Comparison between MR-AQCC  $N_U$  values and a,c) FT-RDFT and b,d) FT-UDFT  $N_{\text{FOD}}$  numbers with the B3LYP density functional for structures with singlet ground electronic state (**1-16, 18, 25-29**) using the a,b) literature-recommended FT of 9000 K and c,d) improved present FT of 8200 K. Included in the FT-UDFT plots b,d) are the FT-RDFT structures for which there is no triplet instability: **1, 5, 18, 25, 26, 29**.

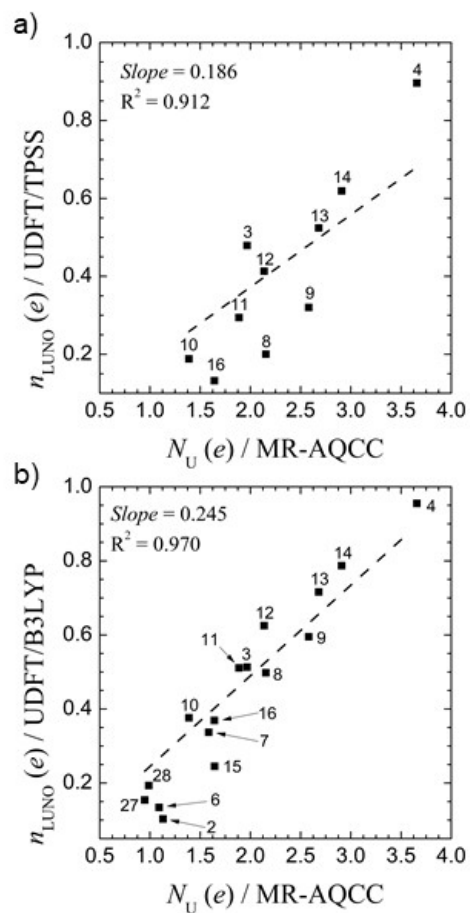

Figure S11. Comparison between the MR-AQCC and a) UDFT/TPSS and b) UDFT/B3LYP LUNO occupation for all UDFT structures with singlet ground state.

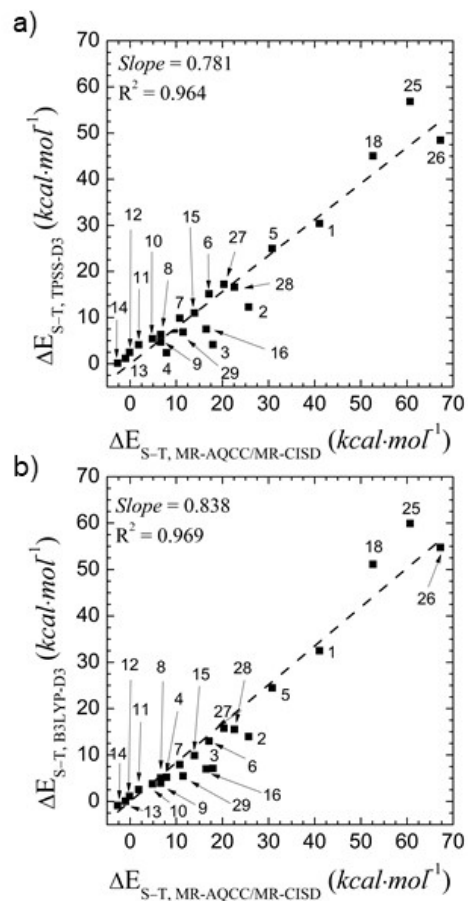

Figure S12. Comparison between the MR-AQCC/MR-CISD+Q and a) TPSS and b) B3LYP singlet/triplet energy ( $\Delta E_{S-T}$ ) for structures with singlet ground electronic state (MR-AQCC: **1-15, 18, 25, 27-29**; MR-CISD+Q: **16, 26**)..

## Optimized Geometries:

Cartesian coordinates are in Å

| Structure 1, | TPSS       |                       |
|--------------|------------|-----------------------|
| C            | 0.0000000  | 0.0000000 0.7268362   |
| C            | 0.0000000  | 0.0000000 -0.7268362  |
| C            | 0.0000000  | 2.4503076 0.7260090   |
| C            | 0.0000000  | -2.4503076 0.7260090  |
| C            | 0.0000000  | 2.4503076 -0.7260090  |
| C            | 0.0000000  | -2.4503076 -0.7260090 |
| C            | -0.0000000 | 1.2341554 1.4069158   |
| C            | -0.0000000 | -1.2341554 1.4069158  |
| C            | -0.0000000 | 1.2341554 -1.4069158  |
| C            | -0.0000000 | -1.2341554 -1.4069158 |
| C            | 0.0000000  | 4.8870981 0.7138033   |
| C            | 0.0000000  | -4.8870981 0.7138033  |
| C            | 0.0000000  | 4.8870981 -0.7138033  |
| C            | -0.0000000 | -4.8870981 -0.7138033 |
| C            | -0.0000000 | 3.7078954 1.4084613   |
| C            | 0.0000000  | -3.7078954 1.4084613  |
| C            | -0.0000000 | 3.7078954 -1.4084613  |
| C            | -0.0000000 | -3.7078954 -1.4084613 |
| H            | -0.0000000 | 1.2344783 2.4954285   |
| H            | 0.0000000  | -1.2344783 2.4954285  |
| H            | -0.0000000 | 1.2344783 -2.4954285  |
| H            | -0.0000000 | -1.2344783 -2.4954285 |
| H            | 0.0000000  | 5.8344541 1.2459907   |
| H            | 0.0000000  | -5.8344541 1.2459907  |
| H            | -0.0000000 | 5.8344541 -1.2459907  |
| H            | 0.0000000  | -5.8344541 -1.2459907 |
| H            | 0.0000000  | 3.7065523 2.4960405   |
| H            | -0.0000000 | -3.7065523 2.4960405  |
| H            | 0.0000000  | 3.7065523 -2.4960405  |
| H            | -0.0000000 | -3.7065523 -2.4960405 |

| Structure 2, | TPSS       |                       |
|--------------|------------|-----------------------|
| C            | 0.0000000  | 4.9063312 0.7283517   |
| C            | 0.0000000  | -4.9063312 0.7283517  |
| C            | 0.0000000  | 4.9063312 -0.7283517  |
| C            | 0.0000000  | -4.9063312 -0.7283517 |
| C            | -0.0000000 | 6.1670107 1.4100209   |
| C            | 0.0000000  | -6.1670107 1.4100209  |
| C            | 0.0000000  | 6.1670107 -1.4100209  |
| C            | 0.0000000  | -6.1670107 -1.4100209 |
| C            | -0.0000000 | 7.3441562 0.7153330   |
| C            | 0.0000000  | -7.3441562 0.7153330  |

|   |            |            |            |
|---|------------|------------|------------|
| C | 0.0000000  | 7.3441562  | -0.7153330 |
| C | 0.0000000  | -7.3441562 | -0.7153330 |
| C | -0.0000000 | 3.6952175  | 1.4091281  |
| C | 0.0000000  | -3.6952175 | 1.4091281  |
| C | -0.0000000 | 3.6952175  | -1.4091281 |
| C | -0.0000000 | -3.6952175 | -1.4091281 |
| C | 0.0000000  | 2.4540163  | 0.7302636  |
| C | 0.0000000  | -2.4540163 | 0.7302636  |
| C | 0.0000000  | 2.4540163  | -0.7302636 |
| C | 0.0000000  | -2.4540163 | -0.7302636 |
| C | 0.0000000  | 0.0000000  | 0.7309610  |
| C | 0.0000000  | 0.0000000  | -0.7309610 |
| C | 0.0000000  | 1.2311673  | 1.4104143  |
| C | 0.0000000  | -1.2311673 | 1.4104143  |
| C | 0.0000000  | 1.2311673  | -1.4104143 |
| C | -0.0000000 | -1.2311673 | -1.4104143 |
| H | 0.0000000  | 6.1661433  | 2.4975913  |
| H | -0.0000000 | -6.1661433 | 2.4975913  |
| H | 0.0000000  | 6.1661433  | -2.4975913 |
| H | -0.0000000 | -6.1661433 | -2.4975913 |
| H | 0.0000000  | 8.2922097  | 1.2463237  |
| H | 0.0000000  | -8.2922097 | 1.2463237  |
| H | 0.0000000  | 8.2922097  | -1.2463237 |
| H | 0.0000000  | -8.2922097 | -1.2463237 |
| H | -0.0000000 | 3.6956874  | 2.4976009  |
| H | 0.0000000  | -3.6956874 | 2.4976009  |
| H | 0.0000000  | 3.6956874  | -2.4976009 |
| H | -0.0000000 | -3.6956874 | -2.4976009 |
| H | 0.0000000  | 1.2312031  | 2.4987034  |
| H | -0.0000000 | -1.2312031 | 2.4987034  |
| H | 0.0000000  | 1.2312031  | -2.4987034 |
| H | 0.0000000  | -1.2312031 | -2.4987034 |

| Structure 3, |            | TPSS       |            |
|--------------|------------|------------|------------|
| C            | 0.0000000  | 7.3639973  | 0.7289102  |
| C            | 0.0000000  | -7.3639973 | 0.7289102  |
| C            | -0.0000000 | 7.3639965  | -0.7289096 |
| C            | 0.0000000  | -7.3639965 | -0.7289096 |
| C            | 0.0000000  | 8.6254804  | 1.4102088  |
| C            | 0.0000000  | -8.6254804 | 1.4102088  |
| C            | 0.0000000  | 8.6254801  | -1.4102093 |
| C            | 0.0000000  | -8.6254801 | -1.4102093 |
| C            | -0.0000000 | 9.8021391  | 0.7158015  |
| C            | 0.0000000  | -9.8021391 | 0.7158015  |
| C            | 0.0000000  | 9.8021382  | -0.7158017 |
| C            | 0.0000000  | -9.8021382 | -0.7158017 |
| C            | 0.0000000  | 6.1543409  | 1.4097198  |



|   |            |             |            |
|---|------------|-------------|------------|
| C | 0.0000000  | -6.1543409  | 1.4097198  |
| C | 0.0000000  | 6.1543410   | -1.4097213 |
| C | 0.0000000  | -6.1543410  | -1.4097213 |
| C | -0.0000000 | 4.9112630   | 0.7312335  |
| C | -0.0000000 | -4.9112630  | 0.7312335  |
| C | 0.0000000  | 4.9112603   | -0.7312352 |
| C | 0.0000000  | -4.9112603  | -0.7312352 |
| C | 0.0000000  | 2.4561176   | 0.7325508  |
| C | 0.0000000  | -2.4561176  | 0.7325508  |
| C | 0.0000000  | 2.4561139   | -0.7325582 |
| C | 0.0000000  | -2.4561139  | -0.7325582 |
| C | -0.0000000 | 3.6911053   | 1.4113196  |
| C | 0.0000000  | -3.6911053  | 1.4113196  |
| C | 0.0000000  | 3.6911033   | -1.4113239 |
| C | 0.0000000  | -3.6911033  | -1.4113239 |
| C | -0.0000000 | 0.0000000   | 0.7329462  |
| C | -0.0000000 | 0.0000000   | -0.7329571 |
| C | 0.0000000  | 1.2301795   | 1.4119673  |
| C | 0.0000000  | -1.2301795  | 1.4119673  |
| C | 0.0000000  | 1.2301779   | -1.4119750 |
| C | -0.0000000 | -1.2301779  | -1.4119750 |
| H | -0.0000000 | 8.6248349   | 2.4977217  |
| H | -0.0000000 | -8.6248349  | 2.4977217  |
| H | 0.0000000  | 8.6248354   | -2.4977205 |
| H | -0.0000000 | -8.6248354  | -2.4977205 |
| H | 0.0000000  | 10.7496634  | 1.2476598  |
| H | 0.0000000  | -10.7496634 | 1.2476598  |
| H | 0.0000000  | 10.7496620  | -1.2476601 |
| H | -0.0000000 | -10.7496620 | -1.2476601 |
| H | 0.0000000  | 6.1551988   | 2.4982078  |
| H | 0.0000000  | -6.1551988  | 2.4982078  |
| H | 0.0000000  | 6.1551988   | -2.4982052 |
| H | 0.0000000  | -6.1551988  | -2.4982052 |
| H | 0.0000000  | 3.6915703   | 2.4996434  |
| H | 0.0000000  | -3.6915703  | 2.4996434  |
| H | 0.0000000  | 3.6915695   | -2.4996347 |
| H | 0.0000000  | -3.6915695  | -2.4996347 |
| H | -0.0000000 | 1.2303717   | 2.5002760  |
| H | 0.0000000  | -1.2303717  | 2.5002760  |
| H | -0.0000000 | 1.2303711   | -2.5002601 |
| H | 0.0000000  | -1.2303711  | -2.5002601 |

Structure 4,

TPSS

|   |           |            |            |
|---|-----------|------------|------------|
| C | 0.0000000 | 7.4002310  | 0.7256661  |
| C | 0.0000000 | -7.4002310 | 0.7256661  |
| C | 0.0000000 | 7.4002320  | -0.7256696 |
| C | 0.0000000 | -7.4002320 | -0.7256696 |

|   |            |             |            |
|---|------------|-------------|------------|
| C | 0.0000000  | 8.6220252   | 1.4036195  |
| C | 0.0000000  | -8.6220252  | 1.4036195  |
| C | 0.0000000  | 8.6220258   | -1.4036218 |
| C | 0.0000000  | -8.6220258  | -1.4036218 |
| C | 0.0000000  | 9.8540946   | 0.7215452  |
| C | 0.0000000  | -9.8540946  | 0.7215452  |
| C | 0.0000000  | 9.8540948   | -0.7215474 |
| C | 0.0000000  | -9.8540948  | -0.7215474 |
| C | 0.0000000  | 6.1529885   | 1.4047807  |
| C | -0.0000000 | -6.1529885  | 1.4047807  |
| C | 0.0000000  | 6.1529889   | -1.4047841 |
| C | 0.0000000  | -6.1529889  | -1.4047841 |
| C | 0.0000000  | 4.9383045   | 0.7287547  |
| C | 0.0000000  | -4.9383045  | 0.7287547  |
| C | 0.0000000  | 4.9383054   | -0.7287591 |
| C | 0.0000000  | -4.9383054  | -0.7287591 |
| C | 0.0000000  | 2.4706251   | 0.7303879  |
| C | 0.0000000  | -2.4706251  | 0.7303879  |
| C | -0.0000000 | 2.4706255   | -0.7303930 |
| C | 0.0000000  | -2.4706255  | -0.7303930 |
| C | -0.0000000 | 3.6893500   | 1.4042480  |
| C | 0.0000000  | -3.6893500  | 1.4042480  |
| C | 0.0000000  | 3.6893499   | -1.4042517 |
| C | 0.0000000  | -3.6893499  | -1.4042517 |
| C | 0.0000000  | 0.0000000   | 0.7308852  |
| C | -0.0000000 | 0.0000000   | -0.7308905 |
| C | -0.0000000 | 1.2293334   | 1.4033379  |
| C | 0.0000000  | -1.2293334  | 1.4033379  |
| C | 0.0000000  | 1.2293332   | -1.4033415 |
| C | 0.0000000  | -1.2293332  | -1.4033415 |
| C | 0.0000000  | 11.1007845  | 1.4038719  |
| C | 0.0000000  | -11.1007845 | 1.4038719  |
| C | 0.0000000  | 11.1007853  | -1.4038728 |
| C | 0.0000000  | -11.1007853 | -1.4038728 |
| C | -0.0000000 | 12.2896929  | 0.7084268  |
| C | 0.0000000  | -12.2896929 | 0.7084268  |
| C | -0.0000000 | 12.2896935  | -0.7084279 |
| C | 0.0000000  | -12.2896935 | -0.7084279 |
| H | 0.0000000  | 8.6233993   | 2.4922327  |
| H | -0.0000000 | -8.6233993  | 2.4922327  |
| H | 0.0000000  | 8.6233996   | -2.4922285 |
| H | 0.0000000  | -8.6233996  | -2.4922285 |
| H | -0.0000000 | 6.1538867   | 2.4934098  |
| H | 0.0000000  | -6.1538867  | 2.4934098  |
| H | 0.0000000  | 6.1538870   | -2.4934031 |
| H | 0.0000000  | -6.1538870  | -2.4934031 |
| H | -0.0000000 | 3.6898774   | 2.4929979  |

|   |            |             |            |
|---|------------|-------------|------------|
| H | 0.0000000  | -3.6898774  | 2.4929979  |
| H | 0.0000000  | 3.6898775   | -2.4929888 |
| H | 0.0000000  | -3.6898775  | -2.4929888 |
| H | -0.0000000 | 1.2295513   | 2.4921804  |
| H | 0.0000000  | -1.2295513  | 2.4921804  |
| H | 0.0000000  | 1.2295512   | -2.4921693 |
| H | -0.0000000 | -1.2295512  | -2.4921693 |
| H | 0.0000000  | 11.0998258  | 2.4914425  |
| H | 0.0000000  | -11.0998258 | 2.4914425  |
| H | 0.0000000  | 11.0998257  | -2.4914410 |
| H | 0.0000000  | -11.0998257 | -2.4914410 |
| H | 0.0000000  | 13.2342565  | 1.2453906  |
| H | 0.0000000  | -13.2342565 | 1.2453906  |
| H | -0.0000000 | 13.2342581  | -1.2453905 |
| H | 0.0000000  | -13.2342581 | -1.2453905 |

| Structure 5, |            | TPSS       |           |
|--------------|------------|------------|-----------|
| C            | 1.4479132  | -0.0024265 | 0.0000000 |
| C            | -1.4479132 | 0.0024265  | 0.0000000 |
| C            | 0.6973477  | 1.2145285  | 0.0000000 |
| C            | -0.6973477 | -1.2145285 | 0.0000000 |
| C            | -0.7660864 | 1.1874432  | 0.0000000 |
| C            | 0.7660864  | -1.1874432 | 0.0000000 |
| C            | 1.1163174  | 2.5338031  | 0.0000000 |
| C            | -1.1163174 | -2.5338031 | 0.0000000 |
| C            | -0.0422358 | 3.4002312  | 0.0000000 |
| C            | 0.0422358  | -3.4002312 | 0.0000000 |
| C            | -1.2129844 | 2.5817331  | 0.0000000 |
| C            | 1.2129844  | -2.5817331 | 0.0000000 |
| C            | -0.1538955 | 4.7934407  | 0.0000000 |
| C            | 0.1538955  | -4.7934407 | 0.0000000 |
| C            | -1.4281327 | 5.3672910  | 0.0000000 |
| C            | 1.4281327  | -5.3672910 | 0.0000000 |
| C            | -2.4741889 | 3.1658292  | 0.0000000 |
| C            | 2.4741889  | -3.1658292 | 0.0000000 |
| C            | -2.5738748 | 4.5637387  | 0.0000000 |
| C            | 2.5738748  | -4.5637387 | 0.0000000 |
| H            | 2.5354794  | 0.0322910  | 0.0000000 |
| H            | -2.5354794 | -0.0322910 | 0.0000000 |
| H            | 2.1471910  | 2.8727558  | 0.0000000 |
| H            | -2.1471910 | -2.8727558 | 0.0000000 |
| H            | 0.7329717  | 5.4220368  | 0.0000000 |
| H            | -0.7329717 | -5.4220368 | 0.0000000 |
| H            | -1.5325966 | 6.4487992  | 0.0000000 |
| H            | 1.5325966  | -6.4487992 | 0.0000000 |
| H            | -3.3751991 | 2.5576298  | 0.0000000 |
| H            | 3.3751991  | -2.5576298 | 0.0000000 |

|   |            |            |           |
|---|------------|------------|-----------|
| H | -3.5551235 | 5.0303776  | 0.0000000 |
| H | 3.5551235  | -5.0303776 | 0.0000000 |

| Structure 6, |            | TPSS       |            |
|--------------|------------|------------|------------|
| C            | -0.7300315 | 0.0097830  | 0.0000000  |
| C            | 0.7300315  | -0.0097830 | 0.0000000  |
| C            | 1.4025772  | -1.2256528 | 0.0000000  |
| C            | -1.4025772 | 1.2256528  | 0.0000000  |
| C            | -1.4455248 | -1.2354174 | -0.0000000 |
| C            | 1.4455248  | 1.2354174  | -0.0000000 |
| C            | 0.6878183  | -2.4433022 | 0.0000000  |
| C            | -0.6878183 | 2.4433022  | 0.0000000  |
| C            | -0.7727303 | -2.4231535 | -0.0000000 |
| C            | 0.7727303  | 2.4231535  | 0.0000000  |
| C            | 1.1168213  | -3.7691240 | -0.0000000 |
| C            | -1.1168213 | 3.7691240  | -0.0000000 |
| C            | -0.0358393 | -4.6294256 | -0.0000000 |
| C            | 0.0358393  | 4.6294256  | -0.0000000 |
| C            | -1.2138689 | -3.8143253 | -0.0000000 |
| C            | 1.2138689  | 3.8143253  | 0.0000000  |
| C            | -0.1480812 | -6.0271840 | 0.0000000  |
| C            | 0.1480812  | 6.0271840  | 0.0000000  |
| C            | -1.4185817 | -6.6003775 | 0.0000000  |
| C            | 1.4185817  | 6.6003775  | 0.0000000  |
| C            | -2.4746575 | -4.4033549 | 0.0000000  |
| C            | 2.4746575  | 4.4033549  | 0.0000000  |
| C            | -2.5701039 | -5.7990006 | 0.0000000  |
| C            | 2.5701039  | 5.7990006  | 0.0000000  |
| H            | 2.4911595  | -1.2319440 | 0.0000000  |
| H            | -2.4911595 | 1.2319440  | 0.0000000  |
| H            | -2.5335953 | -1.1996173 | 0.0000000  |
| H            | 2.5335953  | 1.1996173  | 0.0000000  |
| H            | 2.1482482  | -4.1048307 | 0.0000000  |
| H            | -2.1482482 | 4.1048307  | 0.0000000  |
| H            | 0.7396240  | -6.6546690 | -0.0000000 |
| H            | -0.7396240 | 6.6546690  | -0.0000000 |
| H            | -1.5218009 | -7.6819985 | -0.0000000 |
| H            | 1.5218009  | 7.6819985  | -0.0000000 |
| H            | -3.3767678 | -3.7967754 | 0.0000000  |
| H            | 3.3767678  | 3.7967754  | 0.0000000  |
| H            | -3.5492344 | -6.2700341 | 0.0000000  |
| H            | 3.5492344  | 6.2700341  | 0.0000000  |

| Structure 7, |            | TPSS       |           |
|--------------|------------|------------|-----------|
| C            | 0.7177773  | -1.2379623 | 0.0000000 |
| C            | -0.7177773 | 1.2379623  | 0.0000000 |
| C            | -0.7401565 | -1.2236191 | 0.0000000 |

|   |            |            |            |
|---|------------|------------|------------|
| C | 0.7401565  | 1.2236191  | 0.0000000  |
| C | 1.4019066  | -2.4556171 | 0.0000000  |
| C | -1.4019066 | 2.4556171  | 0.0000000  |
| C | -1.4533413 | -2.4692070 | 0.0000000  |
| C | 1.4533413  | 2.4692070  | 0.0000000  |
| C | 0.6921784  | -3.6697803 | 0.0000000  |
| C | -0.6921784 | 3.6697803  | 0.0000000  |
| C | -0.7729983 | -3.6526444 | 0.0000000  |
| C | 0.7729983  | 3.6526444  | 0.0000000  |
| C | 1.1214639  | -4.9991920 | 0.0000000  |
| C | -1.1214639 | 4.9991920  | 0.0000000  |
| C | -0.0294472 | -5.8566191 | 0.0000000  |
| C | 0.0294472  | 5.8566191  | 0.0000000  |
| C | -1.2100678 | -5.0429611 | 0.0000000  |
| C | 1.2100678  | 5.0429611  | -0.0000000 |
| C | -0.1435688 | -7.2560022 | 0.0000000  |
| C | 0.1435688  | 7.2560022  | 0.0000000  |
| C | -1.4133688 | -7.8276186 | 0.0000000  |
| C | 1.4133688  | 7.8276186  | 0.0000000  |
| C | -2.4715190 | -5.6324705 | 0.0000000  |
| C | 2.4715190  | 5.6324705  | 0.0000000  |
| C | -2.5670755 | -7.0270214 | 0.0000000  |
| C | 2.5670755  | 7.0270214  | 0.0000000  |
| C | -1.4008055 | -0.0066407 | 0.0000000  |
| C | 1.4008055  | 0.0066407  | 0.0000000  |
| H | 2.4903427  | -2.4550050 | 0.0000000  |
| H | -2.4903427 | 2.4550050  | 0.0000000  |
| H | -2.5413625 | -2.4391253 | 0.0000000  |
| H | 2.5413625  | 2.4391253  | 0.0000000  |
| H | 2.1526607  | -5.3347050 | 0.0000000  |
| H | -2.1526607 | 5.3347050  | 0.0000000  |
| H | 0.7435066  | -7.8843534 | 0.0000000  |
| H | -0.7435066 | 7.8843534  | 0.0000000  |
| H | -1.5164126 | -8.9092602 | 0.0000000  |
| H | 1.5164126  | 8.9092602  | 0.0000000  |
| H | -3.3735840 | -5.0257625 | 0.0000000  |
| H | 3.3735840  | 5.0257625  | 0.0000000  |
| H | -3.5455128 | -7.4992575 | 0.0000000  |
| H | 3.5455128  | 7.4992575  | 0.0000000  |
| H | -2.4898456 | 0.0032365  | -0.0000000 |
| H | 2.4898456  | -0.0032365 | 0.0000000  |

Structure 8,

TPSS

|   |            |            |           |
|---|------------|------------|-----------|
| C | 0.7179962  | -2.4632592 | 0.0000000 |
| C | -0.7179984 | 2.4632576  | 0.0000000 |
| C | -0.7422733 | -2.4523332 | 0.0000000 |
| C | 0.7422632  | 2.4523335  | 0.0000000 |

|   |            |             |           |
|---|------------|-------------|-----------|
| C | 1.4047886  | -3.6890221  | 0.0000000 |
| C | -1.4047893 | 3.6890223   | 0.0000000 |
| C | -1.4520349 | -3.7000175  | 0.0000000 |
| C | 1.4520204  | 3.7000319   | 0.0000000 |
| C | 0.6971654  | -4.8970767  | 0.0000000 |
| C | -0.6971984 | 4.8970749   | 0.0000000 |
| C | -0.7688948 | -4.8815712  | 0.0000000 |
| C | 0.7688453  | 4.8815830   | 0.0000000 |
| C | 1.3981292  | -1.2272119  | 0.0000000 |
| C | -1.3981223 | 1.2272108   | 0.0000000 |
| C | -1.4100704 | -1.2383287  | 0.0000000 |
| C | 1.4100662  | 1.2383285   | 0.0000000 |
| C | -0.7267255 | 0.0046425   | 0.0000000 |
| C | 0.7267202  | -0.0046477  | 0.0000000 |
| C | 1.1268163  | -6.2319226  | 0.0000000 |
| C | -1.1268158 | 6.2319070   | 0.0000000 |
| C | -0.0249405 | -7.0866654  | 0.0000000 |
| C | 0.0249112  | 7.0866735   | 0.0000000 |
| C | -1.2054590 | -6.2725538  | 0.0000000 |
| C | 1.2054183  | 6.2725672   | 0.0000000 |
| C | -0.1413769 | -8.4860282  | 0.0000000 |
| C | 0.1413783  | 8.4860222   | 0.0000000 |
| C | -1.4118294 | -9.0565066  | 0.0000000 |
| C | 1.4118333  | 9.0565093   | 0.0000000 |
| C | -2.4672458 | -6.8604012  | 0.0000000 |
| C | 2.4672259  | 6.8604028   | 0.0000000 |
| C | -2.5650190 | -8.2552899  | 0.0000000 |
| C | 2.5650365  | 8.2553034   | 0.0000000 |
| H | 2.4929585  | -3.6865715  | 0.0000000 |
| H | -2.4929315 | 3.6865730   | 0.0000000 |
| H | -2.5400416 | -3.6722190  | 0.0000000 |
| H | 2.5400401  | 3.6722035   | 0.0000000 |
| H | 2.4869655  | -1.2320491  | 0.0000000 |
| H | -2.4869318 | 1.2320441   | 0.0000000 |
| H | -2.4989453 | -1.2319608  | 0.0000000 |
| H | 2.4989724  | 1.2319362   | 0.0000000 |
| H | 2.1582362  | -6.5663734  | 0.0000000 |
| H | -2.1581969 | 6.5663520   | 0.0000000 |
| H | 0.7448806  | -9.1152854  | 0.0000000 |
| H | -0.7448729 | 9.1152611   | 0.0000000 |
| H | -1.5157056 | -10.1382999 | 0.0000000 |
| H | 1.5157121  | 10.1383061  | 0.0000000 |
| H | -3.3682499 | -6.2520102  | 0.0000000 |
| H | 3.3682600  | 6.2520269   | 0.0000000 |
| H | -3.5439508 | -8.7263924  | 0.0000000 |
| H | 3.5439799  | 8.7264245   | 0.0000000 |

|   | Structure 9, | TPSS       |           |
|---|--------------|------------|-----------|
| C | 1.2212303    | 0.7345787  | 0.0000000 |
| C | -1.2212305   | -0.7345688 | 0.0000000 |
| C | 1.2332272    | -0.7216366 | 0.0000000 |
| C | -1.2332283   | 0.7216461  | 0.0000000 |
| C | -0.0009525   | -1.4075024 | 0.0000000 |
| C | 0.0009519    | 1.4075123  | 0.0000000 |
| C | 2.4645934    | 1.4199958  | 0.0000000 |
| C | -2.4645924   | -1.4199858 | 0.0000000 |
| C | 3.6785981    | 0.7547436  | 0.0000000 |
| C | -3.6785953   | -0.7547330 | 0.0000000 |
| C | 2.4635157    | -1.3898268 | 0.0000000 |
| C | -2.4635165   | 1.3898368  | 0.0000000 |
| C | 3.6937127    | -0.7070640 | 0.0000000 |
| C | -3.6937136   | 0.7070747  | 0.0000000 |
| C | 4.9249353    | 1.4688262  | 0.0000000 |
| C | -4.9249308   | -1.4688196 | 0.0000000 |
| C | 6.1078526    | 0.7897791  | 0.0000000 |
| C | -6.1078508   | -0.7897797 | 0.0000000 |
| C | 4.9251612    | -1.3893369 | 0.0000000 |
| C | -4.9251659   | 1.3893423  | 0.0000000 |
| C | 6.1288842    | -0.6771445 | 0.0000000 |
| C | -6.1288876   | 0.6771455  | 0.0000000 |
| C | 7.4978775    | 1.2325937  | 0.0000000 |
| C | -7.4978764   | -1.2325991 | 0.0000000 |
| C | 8.3166222    | 0.0559537  | 0.0000000 |
| C | -8.3166257   | -0.0559616 | 0.0000000 |
| C | 7.4665219    | -1.1003020 | 0.0000000 |
| C | -7.4665282   | 1.1002987  | 0.0000000 |
| C | 8.0794107    | 2.4967911  | 0.0000000 |
| C | -8.0794065   | -2.4967989 | 0.0000000 |
| C | 9.4744317    | 2.6015118  | 0.0000000 |
| C | -9.4744266   | -2.6015212 | 0.0000000 |
| C | 9.7149428    | 0.1786558  | 0.0000000 |
| C | -9.7149474   | -0.1786670 | 0.0000000 |
| C | 10.2801359   | 1.4521752  | 0.0000000 |
| C | -10.2801359  | -1.4521896 | 0.0000000 |
| H | 0.0047241    | -2.4961513 | 0.0000000 |
| H | -0.0047176   | 2.4961612  | 0.0000000 |
| H | 2.4558657    | 2.5088247  | 0.0000000 |
| H | -2.4558625   | -2.5088144 | 0.0000000 |
| H | 2.4706965    | -2.4784926 | 0.0000000 |
| H | -2.4706915   | 2.4785013  | 0.0000000 |
| H | 4.8935114    | 2.5567438  | 0.0000000 |
| H | -4.8935090   | -2.5567372 | 0.0000000 |
| H | 4.9266622    | -2.4773825 | 0.0000000 |
| H | -4.9266669   | 2.4773878  | 0.0000000 |

|   |             |            |           |
|---|-------------|------------|-----------|
| H | 7.8057491   | -2.1301316 | 0.0000000 |
| H | -7.8057636  | 2.1301269  | 0.0000000 |
| H | 7.4667635   | 3.3949187  | 0.0000000 |
| H | -7.4667529  | -3.3949223 | 0.0000000 |
| H | 9.9409009   | 3.5826420  | 0.0000000 |
| H | -9.9408870  | -3.5826557 | 0.0000000 |
| H | 10.3482491  | -0.7047095 | 0.0000000 |
| H | -10.3482666 | 0.7046903  | 0.0000000 |
| H | 11.3615469  | 1.5604361  | 0.0000000 |
| H | -11.3615462 | -1.5604594 | 0.0000000 |

| Structure 10, |            | TPSS       |           |
|---------------|------------|------------|-----------|
| C             | 1.2006915  | 0.7050972  | 0.0000000 |
| C             | 1.2012468  | -0.7391711 | 0.0000000 |
| C             | 0.0000009  | 1.4250576  | 0.0000000 |
| C             | -0.0000002 | -1.4511690 | 0.0000000 |
| C             | -1.2006567 | 0.7051124  | 0.0000000 |
| C             | -1.2012003 | -0.7391785 | 0.0000000 |
| C             | -2.5492748 | 1.1655349  | 0.0000000 |
| C             | -3.4028744 | 0.0391592  | 0.0000000 |
| C             | -2.5832698 | -1.1545322 | 0.0000000 |
| C             | -4.8105540 | -0.0623216 | 0.0000000 |
| C             | -5.3925330 | -1.3185441 | 0.0000000 |
| C             | -3.2000555 | -2.4108043 | 0.0000000 |
| C             | -4.5906487 | -2.4825610 | 0.0000000 |
| C             | 2.5492693  | 1.1655038  | 0.0000000 |
| C             | 3.4028884  | 0.0391489  | 0.0000000 |
| C             | 2.5832654  | -1.1545169 | 0.0000000 |
| C             | 4.8105347  | -0.0623297 | 0.0000000 |
| C             | 5.3925173  | -1.3185351 | 0.0000000 |
| C             | 3.2000609  | -2.4107829 | 0.0000000 |
| C             | 4.5906431  | -2.4825438 | 0.0000000 |
| H             | 0.0000026  | 2.5135069  | 0.0000000 |
| H             | 0.0000047  | -2.5394341 | 0.0000000 |
| H             | -2.8622766 | 2.2042428  | 0.0000000 |
| H             | -5.4246518 | 0.8348279  | 0.0000000 |
| H             | -6.4743070 | -1.4177185 | 0.0000000 |
| H             | -2.6091766 | -3.3230223 | 0.0000000 |
| H             | -5.0751630 | -3.4557664 | 0.0000000 |
| H             | 2.8622613  | 2.2041820  | 0.0000000 |
| H             | 5.4246363  | 0.8348030  | 0.0000000 |
| H             | 6.4742809  | -1.4177158 | 0.0000000 |
| H             | 2.6091902  | -3.3229890 | 0.0000000 |
| H             | 5.0751481  | -3.4557395 | 0.0000000 |

| Structure 11, |           | TPSS      |           |
|---------------|-----------|-----------|-----------|
| C             | 0.0000143 | 1.3776484 | 0.0000000 |



|   |            |            |           |
|---|------------|------------|-----------|
| C | -0.0000042 | -0.0712536 | 0.0000000 |
| C | -1.2289171 | 2.0788150  | 0.0000000 |
| C | -1.2390082 | -0.7613088 | 0.0000000 |
| C | -2.4328165 | 1.3846666  | 0.0000000 |
| C | -2.4320763 | -0.0677726 | 0.0000000 |
| C | -3.7808425 | 1.8402716  | 0.0000000 |
| C | -4.6323406 | 0.7062782  | 0.0000000 |
| C | -3.8182233 | -0.4862988 | 0.0000000 |
| C | -6.0395424 | 0.5992046  | 0.0000000 |
| C | -6.6170445 | -0.6605249 | 0.0000000 |
| C | -4.4264522 | -1.7441106 | 0.0000000 |
| C | -5.8176451 | -1.8238407 | 0.0000000 |
| C | 1.2289284  | 2.0788026  | 0.0000000 |
| C | 2.4328280  | 1.3846780  | 0.0000000 |
| C | 1.2390578  | -0.7612911 | 0.0000000 |
| C | 2.4320447  | -0.0677875 | 0.0000000 |
| C | 3.7808419  | 1.8402608  | 0.0000000 |
| C | 4.6323243  | 0.7062815  | 0.0000000 |
| C | 3.8182369  | -0.4862918 | 0.0000000 |
| C | 6.0395394  | 0.5991964  | 0.0000000 |
| C | 6.6170288  | -0.6605179 | 0.0000000 |
| C | 4.4264422  | -1.7441057 | 0.0000000 |
| C | 5.8176403  | -1.8238413 | 0.0000000 |
| H | -1.2134674 | 3.1673152  | 0.0000000 |
| H | -1.2252595 | -1.8498676 | 0.0000000 |
| H | -4.0995686 | 2.8765777  | 0.0000000 |
| H | -6.6595528 | 1.4921227  | 0.0000000 |
| H | -7.6989540 | -0.7602929 | 0.0000000 |
| H | -3.8302032 | -2.6529121 | 0.0000000 |
| H | -6.2995751 | -2.7978300 | 0.0000000 |
| H | 1.2134978  | 3.1673225  | 0.0000000 |
| H | 1.2252541  | -1.8498636 | 0.0000000 |
| H | 4.0995633  | 2.8765635  | 0.0000000 |
| H | 6.6595267  | 1.4921309  | 0.0000000 |
| H | 7.6989397  | -0.7602873 | 0.0000000 |
| H | 3.8302073  | -2.6529050 | 0.0000000 |
| H | 6.2995775  | -2.7978318 | 0.0000000 |

Structure 12,

TPSS

|   |            |            |           |
|---|------------|------------|-----------|
| C | -1.2292512 | 2.0476390  | 0.0000000 |
| C | -1.2297028 | 0.5962667  | 0.0000000 |
| C | -2.4595286 | 2.7543279  | 0.0000000 |
| C | -2.4756245 | -0.0972782 | 0.0000000 |
| C | -3.6612081 | 2.0601760  | 0.0000000 |
| C | -3.6594066 | 0.5990450  | 0.0000000 |
| C | -5.0080461 | 2.5093064  | 0.0000000 |
| C | -5.8601411 | 1.3707112  | 0.0000000 |

|   |            |            |           |
|---|------------|------------|-----------|
| C | -5.0488707 | 0.1798415  | 0.0000000 |
| C | -7.2657686 | 1.2616935  | 0.0000000 |
| C | -7.8421506 | -0.0005224 | 0.0000000 |
| C | -5.6523463 | -1.0785025 | 0.0000000 |
| C | -7.0446059 | -1.1626911 | 0.0000000 |
| C | -0.0000000 | 2.7224876  | 0.0000000 |
| C | 1.2292512  | 2.0476390  | 0.0000000 |
| C | -0.0000000 | -0.0756015 | 0.0000000 |
| C | 1.2297028  | 0.5962667  | 0.0000000 |
| C | 2.4595286  | 2.7543279  | 0.0000000 |
| C | 3.6612081  | 2.0601760  | 0.0000000 |
| C | 2.4756245  | -0.0972782 | 0.0000000 |
| C | 3.6594066  | 0.5990450  | 0.0000000 |
| C | 5.0080461  | 2.5093064  | 0.0000000 |
| C | 5.8601411  | 1.3707112  | 0.0000000 |
| C | 5.0488707  | 0.1798415  | 0.0000000 |
| C | 7.2657686  | 1.2616935  | 0.0000000 |
| C | 7.8421506  | -0.0005224 | 0.0000000 |
| C | 5.6523463  | -1.0785025 | 0.0000000 |
| C | 7.0446059  | -1.1626911 | 0.0000000 |
| H | -2.4419874 | 3.8424249  | 0.0000000 |
| H | -2.4631739 | -1.1856189 | 0.0000000 |
| H | -5.3301720 | 3.5444483  | 0.0000000 |
| H | -7.8881144 | 2.1529969  | 0.0000000 |
| H | -8.9242264 | -0.0998776 | 0.0000000 |
| H | -5.0529950 | -1.9853095 | 0.0000000 |
| H | -7.5248251 | -2.1374378 | 0.0000000 |
| H | -0.0000000 | 3.8113590  | 0.0000000 |
| H | 0.0000000  | -1.1647216 | 0.0000000 |
| H | 2.4419874  | 3.8424249  | 0.0000000 |
| H | 2.4631739  | -1.1856189 | 0.0000000 |
| H | 5.3301720  | 3.5444483  | 0.0000000 |
| H | 7.8881144  | 2.1529969  | 0.0000000 |
| H | 8.9242264  | -0.0998776 | 0.0000000 |
| H | 5.0529950  | -1.9853095 | 0.0000000 |
| H | 7.5248251  | -2.1374378 | 0.0000000 |

|   | Structure 13, | TPSS       |           |
|---|---------------|------------|-----------|
| C | -2.4560820    | 1.3912188  | 0.0000000 |
| C | -2.4569061    | -0.0666813 | 0.0000000 |
| C | -3.6893337    | 2.0959596  | 0.0000000 |
| C | -3.7083734    | -0.7599755 | 0.0000000 |
| C | -4.8909525    | 1.4015049  | 0.0000000 |
| C | -4.8878073    | -0.0640102 | 0.0000000 |
| C | -1.2305819    | 2.0634386  | 0.0000000 |
| C | -0.0000033    | 1.3807708  | 0.0000000 |
| C | -1.2381961    | -0.7434810 | 0.0000000 |

|   |             |            |           |
|---|-------------|------------|-----------|
| C | -0.0000046  | -0.0693707 | 0.0000000 |
| C | 1.2305770   | 2.0634388  | 0.0000000 |
| C | 2.4560781   | 1.3912181  | 0.0000000 |
| C | 1.2381888   | -0.7434824 | 0.0000000 |
| C | 2.4569009   | -0.0666830 | 0.0000000 |
| C | 3.6893348   | 2.0959607  | 0.0000000 |
| C | 4.8909521   | 1.4015054  | 0.0000000 |
| C | 3.7083710   | -0.7599786 | 0.0000000 |
| C | 4.8878094   | -0.0640098 | 0.0000000 |
| C | -6.2356771  | 1.8461620  | 0.0000000 |
| C | -7.0891028  | 0.7041945  | 0.0000000 |
| C | -6.2792030  | -0.4851139 | 0.0000000 |
| C | -8.4932758  | 0.5940789  | 0.0000000 |
| C | -9.0691470  | -0.6700983 | 0.0000000 |
| C | -6.8793485  | -1.7436787 | 0.0000000 |
| C | -8.2725977  | -1.8309632 | 0.0000000 |
| C | 6.2356802   | 1.8461631  | 0.0000000 |
| C | 7.0891067   | 0.7041959  | 0.0000000 |
| C | 6.2792040   | -0.4851132 | 0.0000000 |
| C | 8.4932799   | 0.5940817  | 0.0000000 |
| C | 9.0691513   | -0.6700981 | 0.0000000 |
| C | 6.8793504   | -1.7436806 | 0.0000000 |
| C | 8.2726001   | -1.8309637 | 0.0000000 |
| H | -3.6725588  | 3.1839334  | 0.0000000 |
| H | -3.6957605  | -1.8482891 | 0.0000000 |
| H | -1.2260529  | 3.1520218  | 0.0000000 |
| H | -1.2412830  | -1.8323823 | 0.0000000 |
| H | 1.2260469   | 3.1520234  | 0.0000000 |
| H | 1.2412769   | -1.8323835 | 0.0000000 |
| H | 3.6725588   | 3.1839358  | 0.0000000 |
| H | 3.6957569   | -1.8482909 | 0.0000000 |
| H | -6.5602692  | 2.8805419  | 0.0000000 |
| H | -9.1174270  | 1.4840778  | 0.0000000 |
| H | -10.1513108 | -0.7692123 | 0.0000000 |
| H | -6.2780384  | -2.6492396 | 0.0000000 |
| H | -8.7512793  | -2.8063025 | 0.0000000 |
| H | 6.5602721   | 2.8805426  | 0.0000000 |
| H | 9.1174353   | 1.4840798  | 0.0000000 |
| H | 10.1513173  | -0.7692119 | 0.0000000 |
| H | 6.2780402   | -2.6492438 | 0.0000000 |
| H | 8.7512834   | -2.8063064 | 0.0000000 |

Structure 14,

TPSS

|   |            |           |           |
|---|------------|-----------|-----------|
| C | 1.2264167  | 2.0940155 | 0.0000000 |
| C | -1.2264152 | 2.0940184 | 0.0000000 |
| C | 1.2270883  | 0.6393980 | 0.0000000 |
| C | -1.2270979 | 0.6393999 | 0.0000000 |

|   |             |            |           |
|---|-------------|------------|-----------|
| C | -0.0000032  | 2.7744383  | 0.0000000 |
| C | 0.0000017   | -0.0397064 | 0.0000000 |
| C | 2.4614718   | 2.7757850  | 0.0000000 |
| C | -2.4614736  | 2.7757887  | 0.0000000 |
| C | 3.6853732   | 2.1043112  | 0.0000000 |
| C | -3.6853761  | 2.1043131  | 0.0000000 |
| C | 2.4720654   | -0.0337720 | 0.0000000 |
| C | -2.4720643  | -0.0337679 | 0.0000000 |
| C | 3.6853940   | 0.6427996  | 0.0000000 |
| C | -3.6853938  | 0.6427968  | 0.0000000 |
| C | 4.9200112   | 2.8057544  | 0.0000000 |
| C | -4.9200030  | 2.8057571  | 0.0000000 |
| C | 6.1222604   | 2.1092578  | 0.0000000 |
| C | -6.1222663  | 2.1092522  | 0.0000000 |
| C | 4.9390187   | -0.0526735 | 0.0000000 |
| C | -4.9390314  | -0.0526655 | 0.0000000 |
| C | 6.1168539   | 0.6411622  | 0.0000000 |
| C | -6.1168362  | 0.6411519  | 0.0000000 |
| C | 7.4649872   | 2.5490273  | 0.0000000 |
| C | -7.4649932  | 2.5490242  | 0.0000000 |
| C | 8.3187672   | 1.4038094  | 0.0000000 |
| C | -8.3187650  | 1.4038111  | 0.0000000 |
| C | 7.5090097   | 0.2165585  | 0.0000000 |
| C | -7.5090041  | 0.2165527  | 0.0000000 |
| C | 9.7212386   | 1.2929280  | 0.0000000 |
| C | -9.7212455  | 1.2929261  | 0.0000000 |
| C | 10.2966861  | 0.0269959  | 0.0000000 |
| C | -10.2966851 | 0.0269950  | 0.0000000 |
| C | 8.1060679   | -1.0424619 | 0.0000000 |
| C | -8.1060624  | -1.0424651 | 0.0000000 |
| C | 9.5002879   | -1.1324262 | 0.0000000 |
| C | -9.5002861  | -1.1324289 | 0.0000000 |
| H | -0.0000058  | 3.8628194  | 0.0000000 |
| H | 0.0000002   | -1.1283982 | 0.0000000 |
| H | 2.4569719   | 3.8642854  | 0.0000000 |
| H | -2.4569817  | 3.8642896  | 0.0000000 |
| H | 2.4747503   | -1.1226089 | 0.0000000 |
| H | -2.4747496  | -1.1226093 | 0.0000000 |
| H | 4.9052045   | 3.8936316  | 0.0000000 |
| H | -4.9052140  | 3.8936320  | 0.0000000 |
| H | 4.9238956   | -1.1409120 | 0.0000000 |
| H | -4.9238884  | -1.1409211 | 0.0000000 |
| H | 7.7942548   | 3.5819800  | 0.0000000 |
| H | -7.7942536  | 3.5819838  | 0.0000000 |
| H | 10.3451273  | 2.1831361  | 0.0000000 |
| H | -10.3451163 | 2.1831470  | 0.0000000 |
| H | 11.3789641  | -0.0718629 | 0.0000000 |

|   |             |            |           |
|---|-------------|------------|-----------|
| H | -11.3789648 | -0.0718544 | 0.0000000 |
| H | 7.5023469   | -1.9465047 | 0.0000000 |
| H | -7.5023385  | -1.9465015 | 0.0000000 |
| H | 9.9773592   | -2.1085535 | 0.0000000 |
| H | -9.9773599  | -2.1085487 | 0.0000000 |

| Structure 15, |            | TPSS       |           |
|---------------|------------|------------|-----------|
| C             | -1.0569598 | 5.2951420  | 0.0000000 |
| C             | 1.0569598  | -5.2951420 | 0.0000000 |
| C             | -1.2452426 | 3.8572285  | 0.0000000 |
| C             | 1.2452426  | -3.8572285 | 0.0000000 |
| C             | -2.1702126 | 6.1869133  | 0.0000000 |
| C             | 2.1702126  | -6.1869133 | 0.0000000 |
| C             | -2.6123332 | 3.4487188  | 0.0000000 |
| C             | 2.6123332  | -3.4487188 | 0.0000000 |
| C             | -3.4598178 | 5.7285754  | 0.0000000 |
| C             | 3.4598178  | -5.7285754 | 0.0000000 |
| C             | -3.6696263 | 4.3338101  | 0.0000000 |
| C             | 3.6696263  | -4.3338101 | 0.0000000 |
| C             | 1.3587880  | 5.0470620  | 0.0000000 |
| C             | -1.3587880 | -5.0470620 | 0.0000000 |
| C             | 1.2071083  | 3.6108796  | 0.0000000 |
| C             | -1.2071083 | -3.6108796 | 0.0000000 |
| C             | 0.2240623  | 5.8485996  | 0.0000000 |
| C             | -0.2240623 | -5.8485996 | 0.0000000 |
| C             | -0.0787146 | 2.9858279  | 0.0000000 |
| C             | 0.0787146  | -2.9858279 | 0.0000000 |
| C             | 3.7934647  | 4.8814991  | 0.0000000 |
| C             | -3.7934647 | -4.8814991 | 0.0000000 |
| C             | 3.6806492  | 3.4852115  | 0.0000000 |
| C             | -3.6806492 | -3.4852115 | 0.0000000 |
| C             | 2.6515797  | 5.6485877  | 0.0000000 |
| C             | -2.6515797 | -5.6485877 | 0.0000000 |
| C             | 2.4339530  | 2.8462456  | 0.0000000 |
| C             | -2.4339530 | -2.8462456 | 0.0000000 |
| C             | 2.3653905  | 1.4380211  | 0.0000000 |
| C             | -2.3653905 | -1.4380211 | 0.0000000 |
| C             | 1.1601870  | 0.7690571  | 0.0000000 |
| C             | -1.1601870 | -0.7690571 | 0.0000000 |
| C             | -0.1027592 | 1.4984900  | 0.0000000 |
| C             | 0.1027592  | -1.4984900 | 0.0000000 |
| C             | 1.2000106  | -0.6615186 | 0.0000000 |
| C             | -1.2000106 | 0.6615186  | 0.0000000 |
| H             | -1.9569876 | 7.2533464  | 0.0000000 |
| H             | 1.9569876  | -7.2533464 | 0.0000000 |
| H             | -2.8823319 | 2.4100165  | 0.0000000 |
| H             | 2.8823319  | -2.4100165 | 0.0000000 |

|   |            |            |           |
|---|------------|------------|-----------|
| H | -4.3005453 | 6.4160753  | 0.0000000 |
| H | 4.3005453  | -6.4160753 | 0.0000000 |
| H | -4.6821117 | 3.9391942  | 0.0000000 |
| H | 4.6821117  | -3.9391942 | 0.0000000 |
| H | 0.3330729  | 6.9312830  | 0.0000000 |
| H | -0.3330729 | -6.9312830 | 0.0000000 |
| H | 4.7739855  | 5.3493352  | 0.0000000 |
| H | -4.7739855 | -5.3493352 | 0.0000000 |
| H | 4.5749591  | 2.8667805  | 0.0000000 |
| H | -4.5749591 | -2.8667805 | 0.0000000 |
| H | 2.7077905  | 6.7341780  | 0.0000000 |
| H | -2.7077905 | -6.7341780 | 0.0000000 |
| H | 3.2941875  | 0.8707659  | 0.0000000 |
| H | -3.2941875 | -0.8707659 | 0.0000000 |
| H | 2.2073532  | -1.0365163 | 0.0000000 |
| H | -2.2073532 | 1.0365163  | 0.0000000 |

| Structure 16, |            | TPSS       |           |
|---------------|------------|------------|-----------|
| C             | -2.9133717 | 1.0939524  | 0.0000000 |
| C             | 2.9133717  | 1.0939524  | 0.0000000 |
| C             | -3.6178654 | -0.1463396 | 0.0000000 |
| C             | 3.6178654  | -0.1463396 | 0.0000000 |
| C             | -3.6705113 | 2.2761689  | 0.0000000 |
| C             | 3.6705113  | 2.2761689  | 0.0000000 |
| C             | -5.0489656 | -0.1735814 | 0.0000000 |
| C             | 5.0489656  | -0.1735814 | 0.0000000 |
| C             | -5.0690987 | 2.2509413  | 0.0000000 |
| C             | 5.0690987  | 2.2509413  | 0.0000000 |
| C             | -5.7570778 | 1.0501047  | 0.0000000 |
| C             | 5.7570778  | 1.0501047  | 0.0000000 |
| C             | -2.8944330 | -1.3794573 | 0.0000000 |
| C             | 2.8944330  | -1.3794573 | 0.0000000 |
| C             | -3.6010003 | -2.5927188 | 0.0000000 |
| C             | 3.6010003  | -2.5927188 | 0.0000000 |
| C             | -5.7172114 | -1.4282568 | 0.0000000 |
| C             | 5.7172114  | -1.4282568 | 0.0000000 |
| C             | -5.0013316 | -2.6114448 | 0.0000000 |
| C             | 5.0013316  | -2.6114448 | 0.0000000 |
| C             | -1.4489450 | 1.0877922  | 0.0000000 |
| C             | 1.4489450  | 1.0877922  | 0.0000000 |
| C             | -0.7392160 | -0.1778626 | 0.0000000 |
| C             | 0.7392160  | -0.1778626 | 0.0000000 |
| C             | -1.4719994 | -1.3483039 | 0.0000000 |
| C             | 1.4719994  | -1.3483039 | 0.0000000 |
| C             | -0.7007737 | 2.2567829  | 0.0000000 |
| C             | 0.7007737  | 2.2567829  | 0.0000000 |
| H             | -3.1742523 | 3.2409526  | 0.0000000 |

|   |            |            |           |
|---|------------|------------|-----------|
| H | 3.1742523  | 3.2409526  | 0.0000000 |
| H | -5.6167627 | 3.1897196  | 0.0000000 |
| H | 5.6167627  | 3.1897196  | 0.0000000 |
| H | -6.8439868 | 1.0329409  | 0.0000000 |
| H | 6.8439868  | 1.0329409  | 0.0000000 |
| H | -3.0438404 | -3.5266122 | 0.0000000 |
| H | 3.0438404  | -3.5266122 | 0.0000000 |
| H | -6.8041874 | -1.4405281 | 0.0000000 |
| H | 6.8041874  | -1.4405281 | 0.0000000 |
| H | -5.5257673 | -3.5632850 | 0.0000000 |
| H | 5.5257673  | -3.5632850 | 0.0000000 |
| H | -0.9678964 | -2.3103353 | 0.0000000 |
| H | 0.9678964  | -2.3103353 | 0.0000000 |
| H | -1.2018383 | 3.2193707  | 0.0000000 |
| H | 1.2018383  | 3.2193707  | 0.0000000 |

|   | Structure 17, | TPSS       |            |
|---|---------------|------------|------------|
| C | 1.2218281     | -0.0000000 | 0.6384254  |
| C | -1.2218281    | 0.0000000  | 0.6384254  |
| C | 2.4920189     | -0.0000000 | -0.1118454 |
| C | -2.4920189    | -0.0000000 | -0.1118454 |
| C | 1.2294240     | 0.0000000  | 2.0645524  |
| C | -1.2294240    | 0.0000000  | 2.0645524  |
| C | 3.6997905     | 0.0000000  | 0.6615515  |
| C | -3.6997905    | 0.0000000  | 0.6615515  |
| C | 2.4471425     | 0.0000000  | 2.7851746  |
| C | -2.4471425    | 0.0000000  | 2.7851746  |
| C | 3.6725941     | 0.0000000  | 2.0870656  |
| C | -3.6725941    | 0.0000000  | 2.0870656  |
| C | 4.9624911     | 0.0000000  | -0.0433098 |
| C | -4.9624911    | 0.0000000  | -0.0433098 |
| C | 6.1565289     | 0.0000000  | 0.7316290  |
| C | -6.1565289    | 0.0000000  | 0.7316290  |
| C | 4.9026337     | 0.0000000  | 2.8086656  |
| C | -4.9026337    | 0.0000000  | 2.8086656  |
| C | 6.1076307     | 0.0000000  | 2.1124209  |
| C | -6.1076307    | -0.0000000 | 2.1124209  |
| C | 2.5615210     | 0.0000000  | -1.5088711 |
| C | -2.5615210    | 0.0000000  | -1.5088711 |
| C | 3.7905160     | 0.0000000  | -2.1745232 |
| C | -3.7905160    | -0.0000000 | -2.1745232 |
| C | 4.9705735     | 0.0000000  | -1.4525382 |
| C | -4.9705735    | 0.0000000  | -1.4525382 |
| C | 0.0000000     | 0.0000000  | -0.0471643 |
| C | 0.0000000     | 0.0000000  | 2.7632098  |
| H | 7.1049184     | 0.0000000  | 0.1979448  |
| H | -7.1049184    | 0.0000000  | 0.1979448  |

|   |            |            |            |
|---|------------|------------|------------|
| H | 4.8800806  | 0.0000000  | 3.8930587  |
| H | -4.8800806 | 0.0000000  | 3.8930587  |
| H | 7.0323905  | 0.0000000  | 2.6898672  |
| H | -7.0323905 | 0.0000000  | 2.6898672  |
| H | 1.6570922  | 0.0000000  | -2.1071353 |
| H | -1.6570922 | -0.0000000 | -2.1071353 |
| H | 3.8104688  | 0.0000000  | -3.2603122 |
| H | -3.8104688 | 0.0000000  | -3.2603122 |
| H | 0.0000000  | 0.0000000  | -1.1271620 |
| H | 0.0000000  | 0.0000000  | 3.8478796  |
| H | 2.4427439  | 0.0000000  | 3.8694232  |
| H | -2.4427439 | 0.0000000  | 3.8694232  |
| H | 5.9269743  | 0.0000000  | -1.9710568 |
| H | -5.9269743 | 0.0000000  | -1.9710568 |

Structure 18,

TPSS

|   |            |            |            |
|---|------------|------------|------------|
| C | -0.6779230 | 0.0410569  | 2.5223601  |
| C | 0.6779273  | -0.0410564 | 2.5223745  |
| C | -1.4339932 | 0.0520731  | 1.2949367  |
| C | 1.4339996  | -0.0520716 | 1.2949371  |
| C | -0.7255333 | -0.0093417 | 0.0488079  |
| C | 0.7255316  | 0.0093440  | 0.0488151  |
| C | -2.8261526 | 0.0703460  | 1.2903243  |
| C | 2.8261463  | -0.0703461 | 1.2903222  |
| C | -3.5558321 | 0.0224311  | 0.0886320  |
| C | 3.5558416  | -0.0224320 | 0.0886443  |
| C | -1.4308062 | -0.1436135 | -1.1520019 |
| C | 1.4307984  | 0.1436142  | -1.1519981 |
| C | -2.8422800 | -0.1003274 | -1.1525650 |
| C | 2.8422740  | 0.1003292  | -1.1525640 |
| C | -0.6511008 | -0.4238246 | -2.4274414 |
| C | 0.6510973  | 0.4238223  | -2.4274365 |
| C | -1.4932813 | -0.2955727 | -3.6666502 |
| C | 1.4932751  | 0.2955742  | -3.6666552 |
| C | -3.5779843 | -0.1419676 | -2.3834241 |
| C | 3.5779947  | 0.1419662  | -2.3834343 |
| C | -2.8321588 | -0.1980504 | -3.6304755 |
| C | 2.8321619  | 0.1980505  | -3.6304713 |
| C | -4.9795093 | 0.0692012  | 0.0613578  |
| C | 4.9794981  | -0.0692007 | 0.0613403  |
| C | -5.6621191 | 0.0124648  | -1.1311787 |
| C | 5.6621158  | -0.0124640 | -1.1311728 |
| C | -4.9612835 | -0.0851445 | -2.3554433 |
| C | 4.9612737  | 0.0851444  | -2.3554402 |
| H | -1.2270273 | 0.0751640  | 3.4607115  |
| H | 1.2270242  | -0.0751639 | 3.4607129  |
| H | -3.3631527 | 0.1137948  | 2.2359889  |



|   |            |            |            |
|---|------------|------------|------------|
| H | 3.3631549  | -0.1137967 | 2.2359934  |
| H | -0.9878689 | -0.3560823 | -4.6265427 |
| H | 0.9878724  | 0.3560843  | -4.6265401 |
| H | -3.4007731 | -0.1561113 | -4.5576885 |
| H | 3.4007774  | 0.1561100  | -4.5576962 |
| H | -5.5167151 | 0.1522936  | 1.0029061  |
| H | 5.5167233  | -0.1522950 | 1.0029123  |
| H | -6.7479737 | 0.0509482  | -1.1394512 |
| H | 6.7479694  | -0.0509505 | -1.1394516 |
| H | -5.5137004 | -0.1088068 | -3.2918715 |
| H | 5.5137100  | 0.1088056  | -3.2918779 |
| H | -0.3170032 | -1.4803428 | -2.3746524 |
| H | 0.3170049  | 1.4803438  | -2.3746527 |

Structure 19,

TPSS

|   |            |            |            |
|---|------------|------------|------------|
| C | -1.8459963 | -1.9328018 | -0.3967365 |
| C | -3.0574462 | -1.2311617 | -0.0957939 |
| C | -1.9101301 | -3.3073793 | -0.7272218 |
| C | -4.3015076 | -1.9379334 | -0.0996005 |
| C | -3.1281058 | -3.9858520 | -0.7335078 |
| C | -4.3075536 | -3.3226423 | -0.4183119 |
| C | -3.0174459 | 0.1688902  | 0.1709916  |
| C | -4.2339200 | 0.8198723  | 0.4669076  |
| C | -5.4905867 | -1.2318360 | 0.2005527  |
| C | -5.4445424 | 0.1248624  | 0.4853980  |
| C | -0.6166644 | -1.2432372 | -0.3365918 |
| C | -0.5230319 | 0.1241152  | -0.0128937 |
| C | -1.7466868 | 0.8691570  | 0.1259543  |
| C | 0.7470550  | 0.8176943  | 0.0747819  |
| C | 0.7473183  | 2.2402401  | -0.0666659 |
| C | -1.6825039 | 2.2855663  | 0.1368509  |
| C | -0.4929406 | 2.9455353  | -0.0208790 |
| C | 2.0239927  | 0.1605188  | 0.2900565  |
| C | 3.2352746  | 0.8850093  | 0.0446543  |
| C | 1.9516770  | 2.9377726  | -0.2585525 |
| C | 3.1963461  | 2.2817979  | -0.2797687 |
| C | 2.1474115  | -1.1458720 | 0.8173152  |
| C | 3.3904807  | -1.7643887 | 0.9636754  |
| C | 4.5063599  | 0.2373020  | 0.1667159  |
| C | 4.5565215  | -1.1075554 | 0.6043597  |
| C | 5.6892753  | 0.9682505  | -0.1245210 |
| C | 4.4060908  | 2.9692725  | -0.5433803 |
| C | 5.6314422  | 2.3101079  | -0.4805084 |
| H | -0.9886103 | -3.8328800 | -0.9652003 |
| H | -3.1534379 | -5.0431136 | -0.9835640 |
| H | -5.2554665 | -3.8549736 | -0.4209138 |
| H | -4.2387220 | 1.8770889  | 0.7086514  |

|   |            |            |            |
|---|------------|------------|------------|
| H | -6.4373758 | -1.7662220 | 0.2043774  |
| H | -6.3601647 | 0.6588414  | 0.7255583  |
| H | -2.5989378 | 2.8624226  | 0.1973327  |
| H | -0.4731734 | 4.0298771  | -0.0956683 |
| H | 3.4367514  | -2.7707282 | 1.3712777  |
| H | 5.5220612  | -1.5983240 | 0.6973327  |
| H | 4.3635312  | 4.0275008  | -0.7884020 |
| H | 6.5482259  | 2.8533411  | -0.6935121 |
| H | 1.9164067  | 4.0148095  | -0.4087105 |
| H | 6.6475460  | 0.4602571  | -0.0489093 |
| H | 1.2618918  | -1.6661748 | 1.1617322  |
| H | 0.2792350  | -1.7870140 | -0.6146626 |

| Structure 20, |            | TPSS       |            |
|---------------|------------|------------|------------|
| C             | -0.0000000 | 0.0000000  | -1.4303654 |
| C             | -0.0000000 | 0.0000000  | -0.0001356 |
| C             | -0.0000000 | 2.4433986  | -1.4109789 |
| C             | -0.0000000 | -2.4433986 | -1.4109789 |
| C             | 0.0000000  | 2.4522796  | -0.0189532 |
| C             | 0.0000000  | -2.4522796 | -0.0189532 |
| C             | 0.0000000  | 1.2422587  | -2.1144949 |
| C             | 0.0000000  | -1.2422587 | -2.1144949 |
| C             | 0.0000000  | 1.2387629  | 0.7150937  |
| C             | 0.0000000  | -1.2387629 | 0.7150937  |
| C             | -0.0000000 | 1.2099746  | 2.1329936  |
| C             | 0.0000000  | -1.2099746 | 2.1329936  |
| C             | 0.0000000  | 0.0000000  | 2.8212496  |
| H             | -0.0000000 | 3.3846332  | -1.9544794 |
| H             | -0.0000000 | -3.3846332 | -1.9544794 |
| H             | 0.0000000  | 3.3948459  | 0.5230617  |
| H             | 0.0000000  | -3.3948459 | 0.5230617  |
| H             | -0.0000000 | 1.2439102  | -3.2016684 |
| H             | -0.0000000 | -1.2439102 | -3.2016684 |
| H             | 0.0000000  | 2.1506005  | 2.6780150  |
| H             | 0.0000000  | -2.1506005 | 2.6780150  |
| H             | -0.0000000 | 0.0000000  | 3.9080750  |

| Structure 21, |            | TPSS       |           |
|---------------|------------|------------|-----------|
| C             | 4.1699974  | -0.5533327 | 0.0000000 |
| C             | 1.4310877  | -0.1882345 | 0.0000000 |
| C             | 3.7031544  | 0.7427337  | 0.0000000 |
| C             | 3.3804350  | -1.6820328 | 0.0000000 |
| C             | 2.2773497  | 0.9660653  | 0.0000000 |
| C             | 1.9460852  | -1.5227262 | 0.0000000 |
| C             | 0.0005778  | 0.0009712  | 0.0000000 |
| C             | -0.5504860 | 1.3345148  | 0.0000000 |
| C             | -0.8785619 | -1.1433253 | 0.0000000 |

|   |            |            |           |
|---|------------|------------|-----------|
| C | 1.7356949  | 2.2588857  | 0.0000000 |
| C | 1.0875166  | -2.6304585 | 0.0000000 |
| C | 0.3470335  | 2.4493632  | 0.0000000 |
| C | -0.3028595 | -2.4531665 | 0.0000000 |
| C | -1.9726224 | 1.4885285  | 0.0000000 |
| C | -2.2926312 | -0.9242502 | 0.0000000 |
| C | -2.4956687 | 2.8335962  | 0.0000000 |
| C | -3.1461626 | -2.0875412 | 0.0000000 |
| C | -0.2357036 | 3.7696193  | 0.0000000 |
| C | -1.2068136 | -3.5775854 | 0.0000000 |
| C | -1.6080834 | 3.8868905  | 0.0000000 |
| C | -2.5628688 | -3.3353787 | 0.0000000 |
| C | -2.8218311 | 0.3735589  | 0.0000000 |
| H | 5.2590822  | -0.7000459 | 0.0000000 |
| H | 4.3480741  | 1.6154413  | 0.0000000 |
| H | 3.7728617  | -2.6937708 | 0.0000000 |
| H | 2.3974378  | 3.1199431  | 0.0000000 |
| H | 1.5025837  | -3.6340582 | 0.0000000 |
| H | -3.5743199 | 2.9524522  | 0.0000000 |
| H | -4.2188622 | -1.9233977 | 0.0000000 |
| H | 0.4415682  | 4.6174001  | 0.0000000 |
| H | -0.7721396 | -4.5717561 | 0.0000000 |
| H | -2.0301050 | 4.9015680  | 0.0000000 |
| H | -3.2322980 | -4.2066531 | 0.0000000 |
| H | -3.8985225 | 0.5161818  | 0.0000000 |

| Structure 22, |            | TPSS       |            |
|---------------|------------|------------|------------|
| C             | 0.0000000  | 0.0000000  | 4.2577137  |
| C             | 0.0000000  | 0.0000000  | 1.4357858  |
| C             | -1.2063267 | 0.0000000  | 3.5587177  |
| C             | 1.2063267  | 0.0000000  | 3.5587177  |
| C             | -1.2222341 | 0.0000000  | 2.1620941  |
| C             | 1.2222341  | -0.0000000 | 2.1620941  |
| C             | 0.0000000  | 0.0000000  | 0.0001377  |
| C             | -1.2433559 | 0.0000000  | -0.7178025 |
| C             | 1.2433559  | 0.0000000  | -0.7178025 |
| C             | -2.5259711 | -0.0000000 | 1.4583835  |
| C             | 2.5259711  | 0.0000000  | 1.4583835  |
| C             | -2.4835593 | 0.0000000  | -0.0225584 |
| C             | 2.4835593  | 0.0000000  | -0.0225584 |
| C             | -1.2612928 | 0.0000000  | -2.1393649 |
| C             | 1.2612928  | 0.0000000  | -2.1393649 |
| C             | -2.4787021 | 0.0000000  | -2.8241005 |
| C             | 2.4787021  | 0.0000000  | -2.8241005 |
| C             | -3.6851024 | 0.0000000  | -0.7347732 |
| C             | 3.6851024  | 0.0000000  | -0.7347732 |
| C             | -3.6872306 | -0.0000000 | -2.1289738 |

|   |            |            |            |
|---|------------|------------|------------|
| C | 3.6872306  | -0.0000000 | -2.1289738 |
| C | 0.0000000  | 0.0000000  | -2.9168202 |
| O | -3.5956836 | 0.0000000  | 2.0764672  |
| O | 3.5956836  | 0.0000000  | 2.0764672  |
| O | 0.0000000  | 0.0000000  | -4.1521470 |
| H | 0.0000000  | 0.0000000  | 5.3437565  |
| H | -2.1612203 | -0.0000000 | 4.0760802  |
| H | 2.1612203  | 0.0000000  | 4.0760802  |
| H | -2.4492765 | 0.0000000  | -3.9097122 |
| H | 2.4492765  | -0.0000000 | -3.9097122 |
| H | -4.6107034 | -0.0000000 | -0.1665211 |
| H | 4.6107034  | 0.0000000  | -0.1665211 |
| H | -4.6278125 | 0.0000000  | -2.6721496 |
| H | 4.6278125  | -0.0000000 | -2.6721496 |

Structure 23,

TPSS

|   |            |            |           |
|---|------------|------------|-----------|
| C | -0.0000049 | 0.0000737  | 0.0000000 |
| C | -0.7419124 | -1.2314001 | 0.0000000 |
| C | -0.6957601 | 1.2582548  | 0.0000000 |
| C | -2.1367272 | -1.1763090 | 0.0000000 |
| C | -2.1517956 | 1.2816556  | 0.0000000 |
| C | -2.8569897 | 0.0399525  | 0.0000000 |
| C | -2.9092591 | 2.4727747  | 0.0000000 |
| C | -4.2932620 | 2.4497426  | 0.0000000 |
| C | -4.2770319 | 0.0416614  | 0.0000000 |
| C | -4.9860417 | 1.2232438  | 0.0000000 |
| C | 2.1858795  | 1.2224928  | 0.0000000 |
| C | 1.4373990  | -0.0266030 | 0.0000000 |
| C | 1.4630837  | 2.4539235  | 0.0000000 |
| C | 0.0496391  | 2.4384604  | 0.0000000 |
| C | 4.2682832  | 2.4925199  | 0.0000000 |
| C | 3.5961068  | 1.2824989  | 0.0000000 |
| C | 3.5525388  | 3.7058783  | 0.0000000 |
| C | 2.1747619  | 3.6827040  | 0.0000000 |
| C | 2.0870586  | -1.2620542 | 0.0000000 |
| C | 1.3937482  | -2.4938390 | 0.0000000 |
| C | -0.0340089 | -2.5038874 | 0.0000000 |
| C | 2.1022996  | -3.7244984 | 0.0000000 |
| C | 1.4336139  | -4.9293589 | 0.0000000 |
| C | 0.0248273  | -4.9423851 | 0.0000000 |
| C | -0.6871201 | -3.7552631 | 0.0000000 |
| H | -2.7158213 | -2.0942347 | 0.0000000 |
| H | -2.4077725 | 3.4348911  | 0.0000000 |
| H | -4.8470479 | 3.3845008  | 0.0000000 |
| H | -4.7964614 | -0.9139134 | 0.0000000 |
| H | -6.0723993 | 1.2123289  | 0.0000000 |
| H | -0.4549553 | 3.3992687  | 0.0000000 |

|   |            |            |           |
|---|------------|------------|-----------|
| H | 5.3546438  | 2.5049404  | 0.0000000 |
| H | 4.1782296  | 0.3671475  | 0.0000000 |
| H | 4.0864029  | 4.6521745  | 0.0000000 |
| H | 1.6071431  | 4.6106254  | 0.0000000 |
| H | 3.1715053  | -1.3053608 | 0.0000000 |
| H | 3.1895445  | -3.6962848 | 0.0000000 |
| H | 1.9866390  | -5.8647100 | 0.0000000 |
| H | -0.5077805 | -5.8894017 | 0.0000000 |
| H | -1.7711958 | -3.8022103 | 0.0000000 |

| Structure 24, |            | TPSS       |            |
|---------------|------------|------------|------------|
| C             | -1.6676780 | -0.0000000 | -1.4528376 |
| C             | 1.6676780  | 0.0000000  | -1.4528376 |
| C             | -3.0332804 | 0.0000000  | -1.1290404 |
| C             | 3.0332804  | 0.0000000  | -1.1290404 |
| C             | -0.7324978 | 0.0000000  | -0.4274181 |
| C             | 0.7324978  | 0.0000000  | -0.4274181 |
| C             | -3.4573813 | 0.0000000  | 0.2065743  |
| C             | 3.4573813  | -0.0000000 | 0.2065743  |
| C             | -1.1605167 | 0.0000000  | 0.9413354  |
| C             | 1.1605167  | 0.0000000  | 0.9413354  |
| C             | -2.5301213 | -0.0000000 | 1.2490689  |
| C             | 2.5301213  | 0.0000000  | 1.2490689  |
| C             | 0.0000000  | 0.0000000  | 1.7777509  |
| H             | 0.0000000  | 0.0000000  | 2.8624783  |
| H             | -1.3571340 | 0.0000000  | -2.4946723 |
| H             | 1.3571340  | 0.0000000  | -2.4946723 |
| H             | -3.7723600 | 0.0000000  | -1.9256292 |
| H             | 3.7723600  | -0.0000000 | -1.9256292 |
| H             | -4.5208747 | 0.0000000  | 0.4293286  |
| H             | 4.5208747  | -0.0000000 | 0.4293286  |
| H             | -2.8654670 | 0.0000000  | 2.2831758  |
| H             | 2.8654670  | -0.0000000 | 2.2831758  |

| Structure 25, |            | TPSS      |            |
|---------------|------------|-----------|------------|
| C             | 0.0000000  | 0.0000000 | 0.9219464  |
| C             | 0.0000000  | 0.0000000 | 2.3267675  |
| C             | -1.1708351 | 0.0000000 | 0.1230582  |
| C             | 1.1708351  | 0.0000000 | 0.1230582  |
| C             | -2.3975069 | 0.0000000 | 0.7603753  |
| C             | 2.3975069  | 0.0000000 | 0.7603753  |
| C             | -2.4285977 | 0.0000000 | 2.1808911  |
| C             | 2.4285977  | 0.0000000 | 2.1808911  |
| C             | -1.2780937 | 0.0000000 | 2.9529410  |
| C             | 1.2780937  | 0.0000000 | 2.9529410  |
| C             | -0.7141768 | 0.0000000 | -1.2776219 |
| C             | 0.7141768  | 0.0000000 | -1.2776219 |

|   |            |           |            |
|---|------------|-----------|------------|
| C | -1.4144301 | 0.0000000 | -2.4809075 |
| C | 1.4144301  | 0.0000000 | -2.4809075 |
| C | -0.6988796 | 0.0000000 | -3.6832604 |
| C | 0.6988796  | 0.0000000 | -3.6832604 |
| H | -3.3333920 | 0.0000000 | 0.2072295  |
| H | 3.3333920  | 0.0000000 | 0.2072295  |
| H | -3.3956593 | 0.0000000 | 2.6770552  |
| H | 3.3956593  | 0.0000000 | 2.6770552  |
| H | -1.3531037 | 0.0000000 | 4.0376201  |
| H | 1.3531037  | 0.0000000 | 4.0376201  |
| H | -2.5014714 | 0.0000000 | -2.4937177 |
| H | 2.5014714  | 0.0000000 | -2.4937177 |
| H | -1.2355843 | 0.0000000 | -4.6280198 |
| H | 1.2355843  | 0.0000000 | -4.6280198 |

Structure 26,

TPSS

|   |            |            |           |
|---|------------|------------|-----------|
| C | -3.3962308 | 0.0000000  | 0.0000000 |
| C | 3.3962308  | 0.0000000  | 0.0000000 |
| C | -4.8005105 | 0.0000000  | 0.0000000 |
| C | 4.8005105  | 0.0000000  | 0.0000000 |
| C | -3.2349503 | -2.3976138 | 0.0000000 |
| C | -3.2349503 | 2.3976138  | 0.0000000 |
| C | 3.2349503  | -2.3976138 | 0.0000000 |
| C | 3.2349503  | 2.3976138  | 0.0000000 |
| C | -2.5965159 | -1.1704349 | 0.0000000 |
| C | -2.5965159 | 1.1704349  | 0.0000000 |
| C | 2.5965159  | -1.1704349 | 0.0000000 |
| C | 2.5965159  | 1.1704349  | 0.0000000 |
| C | -4.6551065 | -2.4285523 | 0.0000000 |
| C | -4.6551065 | 2.4285523  | 0.0000000 |
| C | 4.6551065  | -2.4285523 | 0.0000000 |
| C | 4.6551065  | 2.4285523  | 0.0000000 |
| C | -5.4271659 | -1.2778501 | 0.0000000 |
| C | -5.4271659 | 1.2778501  | 0.0000000 |
| C | 5.4271659  | -1.2778501 | 0.0000000 |
| C | 5.4271659  | 1.2778501  | 0.0000000 |
| C | 0.0000000  | -1.4323483 | 0.0000000 |
| C | 0.0000000  | 1.4323483  | 0.0000000 |
| C | -1.1973245 | -0.7161534 | 0.0000000 |
| C | -1.1973245 | 0.7161534  | 0.0000000 |
| C | 1.1973245  | -0.7161534 | 0.0000000 |
| C | 1.1973245  | 0.7161534  | 0.0000000 |
| H | -2.6821683 | -3.3336753 | 0.0000000 |
| H | -2.6821683 | 3.3336753  | 0.0000000 |
| H | 2.6821683  | -3.3336753 | 0.0000000 |
| H | 2.6821683  | 3.3336753  | 0.0000000 |
| H | -5.1516473 | -3.3955451 | 0.0000000 |

|   |            |            |           |
|---|------------|------------|-----------|
| H | -5.1516473 | 3.3955451  | 0.0000000 |
| H | 5.1516473  | -3.3955451 | 0.0000000 |
| H | 5.1516473  | 3.3955451  | 0.0000000 |
| H | -6.5118809 | -1.3519831 | 0.0000000 |
| H | -6.5118809 | 1.3519831  | 0.0000000 |
| H | 6.5118809  | -1.3519831 | 0.0000000 |
| H | 6.5118809  | 1.3519831  | 0.0000000 |
| H | 0.0000000  | -2.5199524 | 0.0000000 |
| H | 0.0000000  | 2.5199524  | 0.0000000 |

| Structure 27, |            | TPSS       |           |
|---------------|------------|------------|-----------|
| C             | 0.7078299  | 0.0000000  | 0.0000000 |
| C             | -0.7078299 | 0.0000000  | 0.0000000 |
| C             | 3.6122715  | 0.0000000  | 0.0000000 |
| C             | -3.6122715 | 0.0000000  | 0.0000000 |
| C             | 1.4797607  | 1.2187636  | 0.0000000 |
| C             | 1.4797607  | -1.2187636 | 0.0000000 |
| C             | -1.4797607 | 1.2187636  | 0.0000000 |
| C             | -1.4797607 | -1.2187636 | 0.0000000 |
| C             | 2.8400318  | 1.2239970  | 0.0000000 |
| C             | 2.8400318  | -1.2239970 | 0.0000000 |
| C             | -2.8400318 | 1.2239970  | 0.0000000 |
| C             | -2.8400318 | -1.2239970 | 0.0000000 |
| C             | 4.9781234  | 0.0000000  | 0.0000000 |
| C             | -4.9781234 | 0.0000000  | 0.0000000 |
| H             | 0.9646771  | 2.1731519  | 0.0000000 |
| H             | 0.9646771  | -2.1731519 | 0.0000000 |
| H             | -0.9646771 | 2.1731519  | 0.0000000 |
| H             | -0.9646771 | -2.1731519 | 0.0000000 |
| H             | 3.3779243  | 2.1695568  | 0.0000000 |
| H             | 3.3779243  | -2.1695568 | 0.0000000 |
| H             | -3.3779243 | 2.1695568  | 0.0000000 |
| H             | -3.3779243 | -2.1695568 | 0.0000000 |
| H             | 5.5432655  | 0.9268544  | 0.0000000 |
| H             | 5.5432655  | -0.9268544 | 0.0000000 |
| H             | -5.5432655 | 0.9268544  | 0.0000000 |
| H             | -5.5432655 | -0.9268544 | 0.0000000 |

| Structure 28, |            | TPSS       |           |
|---------------|------------|------------|-----------|
| C             | 1.2468875  | 0.7049965  | 0.0000000 |
| C             | -1.2468875 | -0.7049965 | 0.0000000 |
| C             | 2.4597686  | 1.3585677  | 0.0000000 |
| C             | -2.4597686 | -1.3585677 | 0.0000000 |
| C             | 3.7178035  | 0.6566229  | 0.0000000 |
| C             | -3.7178035 | -0.6566229 | 0.0000000 |
| C             | -1.2116506 | 0.7544125  | 0.0000000 |
| C             | 1.2116506  | -0.7544125 | 0.0000000 |

|   |            |            |           |
|---|------------|------------|-----------|
| C | -0.0032897 | 1.4065053  | 0.0000000 |
| C | 0.0032897  | -1.4065053 | 0.0000000 |
| C | -3.6559966 | 0.7975852  | 0.0000000 |
| C | 3.6559966  | -0.7975852 | 0.0000000 |
| C | -2.4732882 | 1.4571781  | 0.0000000 |
| C | 2.4732882  | -1.4571781 | 0.0000000 |
| C | 4.9139823  | 1.3179404  | 0.0000000 |
| C | -4.9139823 | -1.3179404 | 0.0000000 |
| H | 2.4794239  | 2.4468817  | 0.0000000 |
| H | -2.4794239 | -2.4468817 | 0.0000000 |
| H | 0.0179348  | 2.4950849  | 0.0000000 |
| H | -0.0179348 | -2.4950849 | 0.0000000 |
| H | -4.5944161 | 1.3467834  | 0.0000000 |
| H | 4.5944161  | -1.3467834 | 0.0000000 |
| H | -2.4500577 | 2.5448392  | 0.0000000 |
| H | 2.4500577  | -2.5448392 | 0.0000000 |
| H | 5.8562706  | 0.7786664  | 0.0000000 |
| H | -5.8562706 | -0.7786664 | 0.0000000 |
| H | 4.9594363  | 2.4027585  | 0.0000000 |
| H | -4.9594363 | -2.4027585 | 0.0000000 |

Structure 29,

TPSS

|   |            |            |            |
|---|------------|------------|------------|
| C | 0.0000000  | 0.0000000  | -2.4337403 |
| C | -1.1342336 | 0.0000000  | -1.5989911 |
| C | 1.1342336  | 0.0000000  | -1.5989911 |
| C | -2.5128484 | 0.0000000  | -1.8523705 |
| C | 2.5128484  | 0.0000000  | -1.8523705 |
| C | -3.4303856 | -0.0000000 | -0.7925785 |
| C | 3.4303856  | 0.0000000  | -0.7925785 |
| C | -3.0248218 | 0.0000000  | 0.5432671  |
| C | 3.0248218  | 0.0000000  | 0.5432671  |
| C | -1.6532034 | 0.0000000  | 0.8819559  |
| C | 1.6532034  | 0.0000000  | 0.8819559  |
| C | -1.2720066 | 0.0000000  | 2.2361226  |
| C | 1.2720066  | 0.0000000  | 2.2361226  |
| C | 0.0000000  | 0.0000000  | 2.8188984  |
| C | -0.6923089 | 0.0000000  | -0.1952137 |
| C | 0.6923089  | 0.0000000  | -0.1952137 |
| H | 0.0000000  | 0.0000000  | -3.5160833 |
| H | -2.8808975 | 0.0000000  | -2.8758527 |
| H | 2.8808975  | 0.0000000  | -2.8758527 |
| H | -4.4934742 | 0.0000000  | -1.0191401 |
| H | 4.4934742  | 0.0000000  | -1.0191401 |
| H | -3.7637515 | -0.0000000 | 1.3398344  |
| H | 3.7637515  | 0.0000000  | 1.3398344  |
| H | -2.1007373 | 0.0000000  | 2.9447888  |
| H | 2.1007373  | 0.0000000  | 2.9447888  |



H 0.0000000 0.0000000 3.9072810
